1 **How exerting control over outcomes affects the neural coding of tasks**  
2 **and outcomes**

3

4 David Wisniewski<sup>1</sup>, Birte Forstmann<sup>2</sup>, Marcel Brass<sup>1</sup>

5

6 1 Department of Experimental Psychology, Ghent University, Belgium

7 2 Integrative Model-Based Cognitive Neuroscience Research Unit, University of Amsterdam, The  
8 Netherlands

9

10

11

12 **Corresponding author**

13 David Wisniewski

14 Department of Experimental Psychology, Ghent University

15 Henri Dunantlaan 2

16 9000 Gent

17 Tel: +32 (0)9 2649428

18 Email: david.wisniewski@ugent.be

19

20 Conflict of interest: The authors declare not competing financial interests.

21

22 **Acknowledgements**

23 We would like to thank Anita Tusche, Carlo Reverberi, and Ruth Krebs for valuable discussions on this  
24 project. This research was supported by the Research Foundation Flanders (FWO), the European Union's  
25 Horizon 2020 research and innovation program under the Marie Skłodowska-Curie grant agreement No  
26 665501, FWO grant FWO.OPR.2013.0136.01, an ERC StG grant and NWO Vidi grant.

27 **Abstract**

28 Humans make choices every day, which are often intended to lead to desirable outcomes. While we often  
29 have some degree of control over the outcomes of our actions, in many cases this control remains limited.  
30 Here, we investigate the effect of control over outcomes on the neural correlates of outcome valuation  
31 and implementation of behavior, as desired outcomes can only be reached if choices are implemented as  
32 intended. In a value-based decision-making task, reward outcomes were either contingent on trial-by-trial  
33 choices between two different tasks, or were unrelated to these choices. Using fMRI, multivariate pattern  
34 analysis, and model-based neuroscience methods, we identified reward representations in a large  
35 network including the striatum, dorso-medial prefrontal cortex (dmPFC) and parietal cortex. These  
36 representations were amplified when rewards were contingent on subjects' choices. We further assessed  
37 the implementation of chosen tasks by identifying brain regions encoding tasks during a preparation or  
38 maintenance phase, and found them to be encoded in the dmPFC and parietal cortex. Importantly,  
39 outcome contingency did not affect neural coding of chosen tasks. This suggests that controlling choice  
40 outcomes selectively affects the neural coding of these outcomes, but has no effect on the means to reach  
41 them. Overall, our findings highlight the role of the dmPFC and parietal cortex in processing of value-  
42 related and task-related information, linking motivational and control-related processes in the brain.  
43 These findings inform current debates on the neural basis of motivational and cognitive control, as well  
44 as their interaction.

45 **Significance statement**

46 We all make hundreds of choices every day, and we want them to have positive consequences. Often, the  
47 link between a choice and its outcomes is fairly clear (healthy diet -> lower risk of cardiovascular disease),  
48 but we do not always have a high degree of control over the outcomes of our choices (genetic risk factors  
49 -> high risk despite a healthy diet). Control over outcomes is a key factor for decision-making, yet its neural  
50 correlates remain poorly understood. Here, subjects performed a value-based decision-making task, while  
51 we manipulated the degree of control over choice outcomes. We found that more control enhances the  
52 neural coding of choice outcomes, but had no effect on the implementation of the chosen behavior.

53

## 54 Introduction

55

56 Making decisions is an integral part of our life. Most of these choices are value-based, i.e. they are made  
57 with expected outcomes in mind. Value-based choices are made in separate stages: we first evaluate all  
58 options, and then select the option with the highest subjective value (Domenech et al., 2018). After  
59 implementing the chosen behavior (Rubinstein et al., 2001), predicted and experienced outcomes are  
60 compared, and prediction errors are computed (Matsumoto et al., 2007; Daw et al., 2011; Collins et al.,  
61 2017). This dopamine-mediated learning signal (Schultz, 2016) indicates the need to update our internal  
62 models of action-outcome contingencies (O'Reilly et al., 2013), which then leads to an adaption of future  
63 behavior.

64 This process is modulated by various properties of choice outcomes, e.g. their magnitude (Doya, 2008).  
65 However, one crucial aspect has received little attention in the past: to which degree we have direct  
66 control over the outcomes of our behavior. Clearly, whether or not we believe our choices to *cause* their  
67 outcomes affects decision-making considerably, yet previous work largely focused on direct control over  
68 behavior (Sperduti et al., 2011) and not its outcomes. Some previous research in non-human primates  
69 demonstrated that control over choice outcomes affects valuation processes in the brain. Choice-  
70 contingent rewards elicit different responses in the caudate (Izquierdo et al., 2004) and anterior cingulate  
71 cortex (Chudasama et al., 2013), as compared to non-contingent rewards (see also Elliott et al., 2004).  
72 Importantly, in order to lead to any rewarding outcome, the selected behavior needs to be implemented  
73 as intended first. Arguably, having control over choice outcomes should affect the means to reach those  
74 outcomes. One might expect chosen behaviors to be shielded more strongly against interference if  
75 outcomes are contingent on them (Dreisbach and Wenke, 2011), as not performing the behavior as  
76 intended is potentially costly. For non-contingent outcomes the need for shielding is lower, as e.g.  
77 executing the wrong behavior has no effect on outcomes (see Waskom et al., 2014 for a similar argument,

78 but Botvinick and Cohen, 2014). Previous work demonstrated that implementation of chosen actions,  
79 which includes their maintenance and execution, is supported by a brain network including the  
80 frontopolar (Soon et al., 2013), lateral prefrontal and parietal cortex (Zhang et al., 2013; Wisniewski et al.,  
81 2016; Loose et al., 2017). Some initial evidence suggests that rewarding correct performance of externally  
82 cued tasks indeed enhances their neural representations (Etzel et al., 2016), but this work did not address  
83 the issue of varying degrees of control over choice outcomes.

84 Here, we report an experiment investigating the effects of control over choice outcomes on value-based  
85 decision making. We used a value-based decision-making task to assess the effects of reward contingency  
86 (choice-contingent vs. non-contingent rewards) on valuation and, more importantly, on choice  
87 implementation. For this purpose, we used a combination of multivariate pattern analysis (MVPA, Haynes,  
88 2015) and model-based neuroscience methods (Forstmann and Wagenmakers, 2015). We first  
89 hypothesized that reward contingency affects the neural coding of outcome values in humans, as it does  
90 in non-human primates (Izquierdo et al., 2004; Chudasama et al., 2013). We further assessed whether  
91 implementation of chosen behavior (i.e. coding of chosen tasks) is similarly affected by contingency. We  
92 hypothesized that the lateral prefrontal cortex, and especially the parietal cortex to play a key role in the  
93 implementation of chosen behavior. The parietal cortex represents chosen tasks and actions (Wisniewski  
94 et al., 2016; Domenech et al., 2018), subjective stimulus and action values (Sugrue, 2004; Kahnt et al.,  
95 2014), as well as associations between choice options and their outcomes (Wisniewski et al., 2015a). Using  
96 MVPA, we tested whether task representations in these brain regions were enhanced when rewards were  
97 choice-contingent vs when they were not.

## 98 Materials and Methods

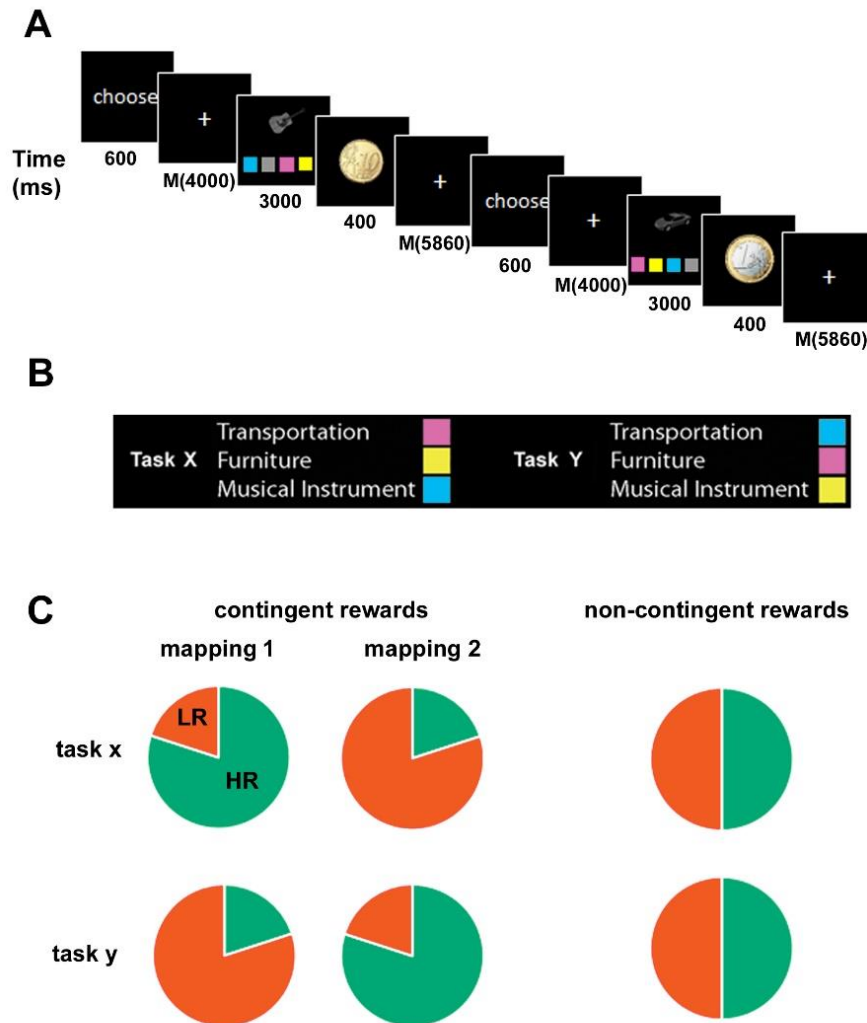

99

100 **Figure 1. Experimental paradigm.** **A.** Trial structure. Each trial started with the cue ‘choose’ presented on  
101 screen. After a variable delay, the task screen was presented for a fixed duration. Reward feedback was  
102 presented subsequently after each trial. All trials were separated by variable inter trial intervals. **B.** Tasks.  
103 Subjects were instructed to identify the visual object presented on screen, and press a corresponding  
104 colored button. The object-category to color mappings are depicted here. Note that the specific mappings  
105 were counterbalanced across subjects. Which task was implemented in each trial was chosen freely by  
106 the subjects. **C.** Reward contingencies. In contingent (RC) trials, one task always yielded a high reward  
107 with a higher probability (80%) than the other task (20%). Which specific task was currently the high-  
108 reward task depended on the current task-reward-mapping, which changed according to a probabilistic  
109 reversal learning procedure (see Materials and Methods for more details). In non-contingent (NCR) trials,  
110 the chance to receive a high and low reward were equal, irrespective of the chosen task.

## 111 Participants

112 A total of 42 subjects participated in this experiment (20 males, 21 females, 1 other). The average age was  
113 22.6 years (min = 18, max = 33 years), 41 subjects were right-handed, one was left-handed. All subjects  
114 had normal or corrected-to-normal vision and volunteered to participate. Subjects gave written informed  
115 consent and received between 45€ and 55€ for their participation. The experiment was approved by the  
116 local ethics committee. Seven subjects showed excessive head movement in the MR scanner (>4mm) and  
117 were excluded. All reported analyses were thus performed on a sample of 35 subjects. Despite the fact  
118 that the multivariate analyses performed in this experiment (see below for details) show notoriously small  
119 effects (Bhandari et al., 2018), we believe to have sufficient statistical power with the given sample size.

## 120 Experimental Design

121 The experiment was programmed using PsychoPy (version 1.85.2, psychopy.org, RRID:SCR\_006571,  
122 Peirce, 2007)). In each trial, subjects were free to choose between two different tasks, and could either  
123 earn a high or a low reward for correct performance. The paradigm is described in more detail below.

## 124 Trial structure

125 Each trial started with the presentation of a fixation cross centrally on-screen for 300ms (Figure 1 A). This  
126 was followed by the presentation of a choice cue, the word 'CHOOSE', for 600ms. This cue instructed  
127 subjects to freely choose one of the two tasks to perform in this trial. After a variable delay period (2000-  
128 6000ms, mean delay duration = 4000ms), the task screen was presented for a total of 3000ms. In this  
129 experiment, we used the same tasks as (Wisniewski et al., 2015b), in order to better compare current  
130 results to this previous experiment on value-based decision-making. The task screen consisted of a visual  
131 object presented centrally on screen (Figure 1 B). This object was picked pseudo-randomly out of a pool  
132 of 9 different objects in 3 categories: musical instruments, furniture, means of transportation. Below, 4  
133 colored squares were presented (magenta, yellow, cyan, gray), with the square positions being mapped

134 onto 4 buttons, operated using the left and right index and middle fingers. Subjects were given the option  
135 to choose which of two stimulus-response-mappings to apply to the presented object. For instance, in  
136 task 'X', means of transportation were associated with the magenta, furniture with the yellow, and  
137 musical instruments with the cyan button. In task 'Y', means of transportation were associated with the  
138 cyan, furniture with the magenta, and musical instruments with the yellow button. Thus, depending on  
139 the chosen task and the presented object, one of the colored buttons was correct for each task, and  
140 subjects were instructed to react as quickly and accurately as possible. We inferred subjects' choices from  
141 their responses. Note, that the grey button was never task-relevant and was merely included to balance  
142 left and right hand responses. Furthermore, the mapping of the colored buttons on screen was pseudo-  
143 randomized in each trial, preventing subjects from preparing a specific motor response before the onset  
144 of the task screen. The specific stimulus-response-mappings called *task X* and *task Y* were counter-  
145 balanced across subjects. Subsequently to the task-screen presentation, subjects were given trial-by-trial  
146 reward feedback, by presenting either an image of a 1€ coin (high reward), a 10€cent coin (low reward),  
147 or a red circle (no reward). The feedback was presented for 400ms. After a variable inter-trial-interval  
148 (4000-14000ms, geometrically distributed, mean duration = 5860ms), the next trial began.

#### 149 Reward conditions

150 Subjects were rewarded for correct performance on every trial. There were a total of two different reward  
151 conditions: contingent rewards (CR) and non-contingent rewards (NCR). In the NCR condition, the chosen  
152 reward in each trial was determined randomly. Irrespective of the chosen task, subjects had a 50% chance  
153 of receiving a high and a 50% chance of receiving a low reward (Figure 1 C). Subjects were instructed to  
154 choose tasks randomly in this condition, by imagining flipping a coin in their head in each trial (Zhang et  
155 al., 2013). In the CR condition, subjects performed a probabilistic reward reversal-learning task, similar to  
156 (Hampton and O'Doherty, 2007). In each trial, one task led to a high reward with an 80% and a low reward  
157 with a 20% probability (high-reward task, HR). These probabilities were reversed for the other task (low-

158 reward task, LR), e.g., in a specific trial, *task X* might be the HR task, while *task Y* might be the LR task.  
159 Subjects were unaware which of the two tasks was the HR task, and needed to learn this from the reward-  
160 feedback provided after each trial. Once they chose the HR task on 3 consecutive trials, the mapping of  
161 rewards onto tasks reversed with a chance of 25% on each subsequent trial, e.g., whereas before *task X*  
162 was the HR and *task Y* the LR task, now *task X* was the LR and *task Y* the HR task. Again, subjects were  
163 unaware of this change in reward-contingencies, and needed to learn when such a switch occurred from  
164 the reward-feedback provided at the end of each trial.

165 At the end of the experiment, 15 trials were chosen randomly, and whichever reward was earned in these  
166 trials was paid out as a bonus payment to the subjects. One half of these trials was chosen from CR trials,  
167 the other from NCR trials, which was communicated to the subjects in order to ensure that both  
168 conditions are equally salient. Thus, subjects were motivated to maximize the reward in CR trials, choosing  
169 the HR task as often as possible. Given that rewards were randomly chosen in NCR trials, they had no  
170 influence over the earned reward in this condition.

171 This reward manipulation was chosen to manipulate the degree of control subjects had over the outcome  
172 of their choices. In CR trials subjects made choices that were directed at earning as much money as they  
173 could, by learning the changing reward contingencies and thus controlling reward outcomes. In NCR trials,  
174 subjects were unable to control outcomes through their choices, as there were no contingencies to learn.

175 This allowed us to assess effects of control over outcomes on valuation and implementation processes. A  
176 second important reason for manipulating reward ‘relevance’ instead of reward presence (as in Etzel et  
177 al., 2016), was that this allowed us to assess specific reward effects on valuation and implementation  
178 processes. When contrasting choices in which subjects could earn a reward, with choices in which no  
179 reward is present (e.g. Libet et al., 1983; Soon et al., 2008), any difference between these conditions might  
180 arise from unspecific processes merely correlated with the presence of reward, like attentional or motor  
181 preparation (Kahnt et al., 2014). This is mainly because strong differences in expected outcomes



182 immediately trigger these preparatory processes selectively in rewarded trials. In contrast, when rewards  
183 are always present, but only sometimes contingent on choices, reward expectations are much more  
184 similar across conditions. In fact, if a subject chose tasks randomly in all trials, the expected value would  
185 be identical in both reward conditions. Thus, only specific reward-related effects, like the fact that reward  
186 outcomes are a relevant factor for making choice only in CR trials, can explain potential differences  
187 between CR and NCR trials.

## 188 Design

189 Subjects performed 5 identical runs of this experiment, with 60 trials each. Each run contained 2 blocks  
190 with CR and 2 blocks with NCR trials. The length of each block was between 10 and 14 trials, and all trials  
191 were all separated by a long and variable ITI. CR and NCR blocks alternated and block order was  
192 counterbalanced across runs for each subject. Each block started with either 'Contingent block now  
193 starting' or 'Non-contingent block now starting' presented on screen for 5000ms. This mixed blocked and  
194 event-related design minimized cross-talk and interference between the reward conditions, and allowed  
195 us to estimate cleaner neural signals.

196 Each run also contained 20% (n=12) catch trials. In these trials, subjects were externally cued which task  
197 to perform, by presenting the words 'TASK X' or 'TASK Y' instead of the 'CHOOSE' cue. The delay between  
198 cue and task execution was 1000ms in these trials. Catch trials were included to prevent subjects from  
199 choosing all tasks in a block at its beginning. For instance, in an NCR block, subjects could theoretically  
200 decide upon a whole sequence of tasks at the beginning of that block (e.g. X,X,X,Y,X,Y,Y,X,...), and then  
201 only implementing that fixed sequence in each trial. In order to encourage subjects to make a conscious  
202 choice in each individual trial, catch trials were included. These trials would frequently disrupt any planned  
203 sequence of task choices, making such a strategy less feasible. In order to increase the salience of these  
204 catch trials, subjects always received a high reward for correct performance. Catch trials were excluded  
205 from all analyses.

206 Furthermore, we ensured that the reward condition was not correlated with any other design variable  
207 (target stimulus, delay duration, button mapping, ITI duration), in order to ensure that estimated neural  
208 signals were not confounded. Lastly, multivariate pattern analyses can be biased if signal estimates are  
209 not based on trials which are IID. Thus we ensured that conditions of the previous trial were not predictive  
210 of the current trial, to make each trial as independent of all other trials as possible.

### 211 Training session

212 Subjects were familiarized with the task in a separate training session outside the MR scanner, lasting  
213 about 1h10min. Subjects first learned to perform the two tasks, were then instructed about the reward  
214 conditions and lastly performed 3 runs of the full experiment (as described above). This training session  
215 was performed to minimize learning effects during the MR session, which can be detrimental to  
216 multivariate pattern analyses. Training sessions were scheduled between 1-5 days before the MR session.  
217 Just before the start of the MR session, subjects performed 10 trials of the task in the MR scanner, in order  
218 to familiarize themselves with the novel environment. These trials were not analyzed.

### 219 Additional measures

220 After completing the MR session, subjects filled in multiple questionnaires. They answered custom  
221 questions (e.g., How believable were the instructions? How different were the reward conditions? How  
222 difficult was making a choice between the two tasks? How difficult was performing the two tasks? Was  
223 one task more difficult than the other? At which point in time did you choose the task to perform in each  
224 trial?), and the following questionnaires: behavioral inhibition / activation scale (BISBAS, Carver and  
225 White, 1994), need for cognition (NFC, Cacioppo et al., 1984), sensitivity to reward / punishment (SPSRQS,  
226 Torrubia et al., 2001), and impulsivity (BIS11, Patton et al., 1995). We also acquired pupil dilation data  
227 while subjects performed the experiment in the MR scanner. Pupil dilation data is not the focus of the  
228 current paper, and is not reported.

## 229 Image acquisition

230 fMRI data was collected using a 3T Magnetom Trio MRI scanner system (Siemens Medical Systems,  
231 Erlangen, Germany), with a standard thirty-two-channel radio-frequency head coil. A 3D high-resolution  
232 anatomical image of the whole brain was acquired for co-registration and normalization of the functional  
233 images, using a T1-weighted MPRAGE sequence (TR = 2250 ms, TE = 4.18 ms, TI = 900 ms, acquisition  
234 matrix =  $256 \times 256$ , FOV = 256 mm, flip angle =  $9^\circ$ , voxel size =  $1 \times 1 \times 1$  mm). Furthermore, a field map  
235 was acquired for each participant, in order to correct for magnetic field inhomogeneities (TR = 400 ms,  
236  $TE_1 = 5.19$  ms,  $TE_2 = 7.65$  ms, image matrix =  $64 \times 64$ , FOV = 192 mm, flip angle =  $60^\circ$ , slice thickness = 3  
237 mm, voxel size =  $3 \times 3 \times 3$  mm, distance factor = 20%, 33 slices). Whole brain functional images were  
238 collected using a T2\*-weighted EPI sequence (TR = 2000 ms, TE = 30 ms, image matrix =  $64 \times 64$ , FOV =  
239 192 mm, flip angle =  $78^\circ$ , slice thickness = 3 mm, voxel size =  $3 \times 3 \times 3$  mm, distance factor = 20%, 33  
240 slices). Slices were orientated along the AC-PC line for each subject.

## 241 Statistical Analysis

### 242 Data Analysis: Behavior

243 All behavioral analyses were performed in R (RStudio version 1.1.383, RRID:SCR\_000432,  
244 [www.rstudio.com](http://www.rstudio.com)). We first characterized subjects' performance by computing error rates and reaction  
245 times (RT). We tested for potential effects of reward condition on error rates using a Bayesian two-sided  
246 paired t-tests (using *ttestBF* from the BayesFactor package in R). Error trials, and trials with RTs <300ms  
247 were removed from the data analysis. In order to identify potential effects of task and reward condition  
248 on RTs, we performed a Bayesian repeated measures ANOVA (using *anovaBF* from the BayesFactor  
249 package in R). This ANOVA included the factors task (X, Y) and reward (CR, NCR), and outputs Bayes Factors  
250 (BF) for all main effects and interaction terms. We did not expect tasks to strongly affect RTs, but did  
251 expect RTs to be lower in the CR condition, as compared to the NCR condition.

252 The Bayesian hypothesis testing employed here allows quantifying the evidence in favor of the alternative  
253 hypothesis (BF10) *and* the null hypothesis (BF01), allowing us to conclude whether we find evidence for  
254 or against a hypothesized effect, or whether the current evidence remains inconclusive (Rouder,  
255 Speckman, Sun, Morey, and Iverson, 2009). Unfortunately, in classical frequentist hypothesis testing we  
256 are unable to provide evidence for the null hypothesis in a similar way (Wagenmakers, 2007). In line with  
257 previous research (e.g. Andraszewicz et al., 2015; Mertens and De Houwer, 2016), we considered BFs  
258 between 1 and 0.3 as anecdotal evidence, BFs between 0.3 and 0.1 as moderate evidence, and BFs smaller  
259 than 0.1 as strong evidence against a hypothesis. BFs between 1 and 3 were considered as anecdotal  
260 evidence, BFs between 3 and 10 as moderate evidence, and BFs larger than 10 as strong evidence for a  
261 hypothesis. Although our conclusions are based solely on the BFs, we also provide frequentists statistical  
262 test outcomes for the interested reader.

263 Given that subjects were free to choose between the two tasks, some subjects might have shown biases  
264 to choosing one of the two tasks more often (although that would not have led to a higher overall reward,  
265 if anything biases should lower overall rewards). In order to quantify biases, we computed the proportion  
266 of trials in which subjects chose task X, separately for the CR and NCR conditions, and tested whether this  
267 value differed from 50% using a two-sided Bayesian t-test. The output BF was interpreted in the same way  
268 as in the previous analysis.

269 Choices in CR trials were assessed two-fold. First, we quantified how well subjects performed the  
270 probabilistic reversal learning task. If subjects were reliably able to determine which of the two tasks was  
271 currently the HR task, they should have chosen that task more often than expected by chance (50%). Thus  
272 the proportion of HR task choices in CR trials is our main measure of how successful subjects were in  
273 performing the task. This measure was compared to chance level using a one-sided Bayesian t-test.  
274 Furthermore, we expected the proportion of HR choices to be higher in CR, than in NCR trials (where it  
275 should be 50%). This was tested using a paired one-sided Bayesian t-test.

276 Second, we assessed whether subjects were able to learn and update reward contingencies in the reversal  
277 learning task. Reinforcement learning (RL) theory suggest that such learning can take place by comparing  
278 received rewards with expected rewards, which are computed from the reward history (Sutton and Barto,  
279 1990; Collins et al., 2017). Discrepancies between actual and expected rewards (reward prediction errors,  
280 RPE) are thought to signal surprise in the brain and to guide adjustment of behavior (Daw and Doya, 2006),  
281 a process which relies on dopaminergic signals in the midbrain (Pessiglione et al., 2006; Schultz, 2016).  
282 Here, we fitted a RL model to the choice data of each subject (separately for CR and NCR trials) in order  
283 to assess the learning process. Fitted RL models used simple delta-rule learning (as implemented in the  
284 *rlfit* package in Matlab, <https://github.com/jmxpearson/rlfit>). For each task choice  $c$  the expected reward  
285  $Q(c)$  was learned from the reward history by comparing the expected and observed rewards at trial  $t$ :

$$286 \quad Q_{t+1}(c) = Q_t(s) + \alpha X \delta_t$$

287 with  $\delta_t = r_t - Q_t(c)$  being the RPE, and  $\alpha$  being the learning rate. Choices were generated following a  
288 softmax choice function (as implemented in the *rlfit* package). The parameters were fitted over  $n = 10$   
289 iterations, with random starting values in each iteration. Learning rates were fitted with constraints  $[0, 1]$ .  
290 In order to assess the model fit, we also estimated a ‘null’ model for each subject. In this model, we again  
291 estimated expected outcomes and RPEs using the same algorithm described above, only fixing the  
292 learning rate to 0. The null model thus assumed that subjects do not learn changing reward contingencies,  
293 and we expected our RL model to outperform this null model. Model fit was assessed using the AIC and  
294 BIC (Burnham and Anderson, 2004). We also assessed an alternative ‘hybrid’ model, in which learning  
295 rates are allowed to vary on a trial-by-trial basis, instead of being fixed for each subject (Bai et al., 2014).  
296 It has been argued that such a model better captures behavior in probabilistic reversal learning tasks. In  
297 our experiment the simple delta-rule learning model outperformed the more complex hybrid model (as  
298 assessed using AIC and BIC), and results from the hybrid model were not assessed further.

299 For each subject, the learning rate was extracted from the best-fitting model. We expected learning rates  
300 to be higher in CR than in NCR trials. In CR trials, the specific reward contingencies changed frequently,  
301 and thus subjects needed to update their contingency representations frequently as well. The learning  
302 rate in CR trials was also expected to correlate with successful task performance (% high reward choices),  
303 given that the reversal learning task can only be performed well if the represented reward contingencies  
304 change over time. In NCR trials, we expected learning rates to be low and uncorrelated with choice  
305 performance, because reward outcomes were randomly chosen and there were no contingencies to learn.  
306 Choices in NCR trials were assessed by testing whether subjects were able to choose tasks randomly in  
307 these trials. For this purpose, we computed the distribution of run lengths for each subject, i.e., the  
308 number of trials subjects chose to consecutively perform the same task. If subjects chose tasks randomly,  
309 this distribution can be expected to follow an exponential distribution (cf. Arrington and Logan, 2004;  
310 Soon et al., 2008). The average run length was computed for each subject, separately for CR and NCR  
311 trials, and compared to the expected run length under random choice behavior. We expected subjects to  
312 show longer runs in CR than in NCR trials, given that the probabilistic reward reversal learning task  
313 encourages subjects to perform the same task repeatedly. This was again tested using a one-sided  
314 Bayesian t-test.

### 315 Data Analysis: fMRI

316 fMRI data analysis was performed using Matlab (version R2014b 8.4.0, RRID:SCR\_001622, The  
317 MathWorks) and SPM12 (RRID:SCR\_007037, [www.fil.ion.ucl.ac.uk/spm/software/spm12/](http://www.fil.ion.ucl.ac.uk/spm/software/spm12/)). Raw data was  
318 imported according to BIDS standards (RRID:SCR\_016124, <http://bids.neuroimaging.io/>). In order to  
319 assess which brain regions contained information about reward outcomes and task choices, raw data was  
320 unwrapped, realigned and slice time corrected. It was then entered into a first level general linear model  
321 analysis (GLM, Friston et al., 1994), and subsequently into a multivariate pattern analysis (MVPA, Cox and

322 Savoy, 2003; Kriegeskorte et al., 2006; Haxby, 2012; Haynes, 2015). In order to assess which brain regions  
323 represented reward-learning signals, raw data was unwarped, realigned, slice time corrected, normalized,  
324 and smoothed. It was then entered into a GLM, adding reward prediction errors as a regressor. Results  
325 were analyzed using a mass-univariate approach. Full details of the analyses can be found below.

### 326 *Neural processing of reward*

327 Multivariate decoding of reward outcomes

328 In a first step, we assessed whether we can replicate previous findings demonstrating contingency effects  
329 on reward processing (Tricomi et al., 2004). For this purpose, we estimated a GLM for each subject. For  
330 each of the 5 runs we added regressors for each combination of reward value (high vs low) and  
331 contingency (CR vs NCR). All regressors were locked to the feedback onset, the duration was set to 0.  
332 Regressors were convolved with a canonical haemodynamic response function (as implemented in  
333 SPM12). Estimated movement parameters were added as regressors of non-interest to this and all other  
334 GLMs reported here.

335 *Baseline decoding:* In a next step, we performed a decoding analysis on the parameter estimates of the  
336 GLM. A support-vector classifier (SVC, see Cox and Savoy, 2003; Mitchell et al., 2004; Kamitani and Tong,  
337 2005), as implemented in *The Decoding Toolbox* (Hebart et al., 2014), was used using a fixed regularization  
338 parameter ( $C = 1$ ). We performed searchlight decoding (Kriegeskorte et al., 2006; Haynes et al., 2007),  
339 which looks for information in local spatial patterns in the brain and makes no a priori assumptions about  
340 informative brain regions. A sphere with a radius of 3 voxels was defined around each measured voxel,  
341 and parameter estimates for high rewards (both in CR and NCR trials), and for low rewards (again, both in  
342 CR and NCR trials) were extracted within that sphere, separately in each run. 4 out of 5 runs were used to  
343 train the SVC to distinguish the neural patterns of high and low rewards. Classifier performance was then  
344 tested on the remaining, independent run. This procedure was repeated until each run was left out once,

345 resulting in a 5-fold cross-validation and countering potential problems with overfitting. Mean prediction  
346 accuracy was calculated across all folds and written into the center voxel of the sphere. This was repeated  
347 for each measured voxel in the brain, resulting in a 3D accuracy map. These maps were computed for each  
348 subject, normalized to a standard space (Montreal Neurological Institute template as implemented in  
349 SPM12), and smoothed (Gaussian kernel, FWHM = 6mm) in order to account for potential differences in  
350 information localization across subjects. Group analyses were performed using a random effects model  
351 on the accuracy maps, using voxel-by-voxel t-tests against chance level (50%). The chance level was  
352 subtracted from all reported accuracy values. A statistical threshold of  $p < 0.0001$  (uncorrected) at the voxel  
353 level, and  $p < 0.05$  (family-wise error corrected) at the cluster level was applied to all analyses. This  
354 threshold is sufficient to rule out inflated false-positive rates in fMRI analyses (Eklund et al., 2016). Any  
355 regions surpassing this threshold were used as masks for the following decoding analyses (an approach  
356 previously used by (Loose et al., 2017). Given that we are mainly interested in *differences* between the  
357 baseline and other analyses, this comparison does not constitute a case of double dipping. Please also  
358 note that this analysis is sensitive to differences in outcome value, but might possibly also identify brain  
359 regions related to unspecific preparatory (e.g., attentional) processes. Although preparatory processes  
360 should be identical in CR and NCR trials, due to the fact that the same high and low rewards were given in  
361 both conditions, we cannot fully exclude such effects either if subjects were generally more motivated to  
362 perform CR than NCR trials. The underlying cause of any observed effects remain differences in reward  
363 outcomes however.

364 *Differences in reward outcome coding:* Although the baseline decoding analysis should have the maximum  
365 power to detect any outcome-related brain regions, results do not allow us to conclude whether outcome  
366 processing differed between CR and NCR trials. For this purpose, we repeated the decoding analysis, now  
367 only using CR trials, and only NCR trials, respectively. If contingent rewards indeed enhance encoding of  
368 reward outcomes in the brain, we should see higher accuracies in the CR than in the NCR decoding



369 analysis. Please note, that we only used half the number of trials as before, thus considerably reducing  
370 the signal-to-noise ratio in these analyses. We thus expected lower statistical power and smaller effects.  
371 *Similarities in in reward outcome coding:* Previous work demonstrated that not all brain regions show a  
372 contingency-related modulation of value signals (Elliott et al., 2004), and we thus tested whether some  
373 brain regions encoded reward outcomes invariantly across the contingency conditions. We trained a  
374 classifier to discriminate between high and low reward outcomes in the CR condition, and tested its  
375 performance in the NCR condition, and vice versa. This resulted in two accuracy maps per subject, which  
376 were averaged and then entered into a group analysis just like in the previous analyses. Importantly, only  
377 brain regions where patterns do not differ across both contingency conditions will show above-chance  
378 accuracies in this analysis. This so-called cross classification analysis can be used to identify brain regions  
379 in which outcome representations are invariant with respect to the contingency manipulation employed  
380 here (see also Kaplan et al., 2015), thus providing positive evidence for contingency-invariant coding of  
381 reward outcomes.

382 Neural correlates of reward-learning signals

383 While the previous analyses investigated the neural correlates of processing the hedonic value of reward  
384 outcomes, here, we directly assessed whether reward-learning signals are affected by reward  
385 contingency. Reward prediction errors (RPE) act as learning signals in our reversal learning task  
386 (Matsumoto et al., 2007; Daw et al., 2011). They indicate the need to update the internal model of the  
387 current task-reward associations (e.g. task X = high reward task). In order to identify brain regions  
388 encoding this important reward signal, we used a model-based fMRI approach (O'Doherty et al., 2007;  
389 Forstmann and Wagenmakers, 2015). In model-based fMRI, a computational model fitted to behavioral  
390 data is used to construct regressors, which are then used to estimate GLMs on fMRI data. This approach  
391 links brain and behavior in a mechanistic framework and has been used successfully in a number of

392 different settings (for an overview see Forstmann and Wagenmakers, 2015). We used the reinforcement  
393 learning models fitted to the behavioral data, and computed trial-by-trial RPEs from the best fitting model  
394 of each subject. We then estimated two separate GLMs, one for CR trials and one for NCR trials, on  
395 normalized and smoothed raw data. For each of the 5 runs, we added one regressor (duration = 0) locked  
396 to the onset of the feedback screen of each trial. Prediction errors should be strongest at this point in  
397 time. We added the trial-by-trial RPEs as a parametric modulator, allowing us to identify brain regions  
398 correlating with RPE signals. As before, regressors were convolved with a canonical haemodynamic  
399 response function. For each subject, a t-contrast map was computed to identify regions reflecting RPEs.  
400 These maps were then entered into a group level random effects analysis (within-subjects ANOVA with  
401 the factor contingency (CR, NCR)) in order to identify brain regions where prediction errors were  
402 modulated by reward contingency. Results were thresholded at  $p < 0.001$  (uncorrected) at the voxel level,  
403  $p < 0.05$  (FWE corrected) at the cluster level.

#### 404 *Multivariate decoding of tasks*

405 All analyses described above aimed at assessing effects of reward contingency on reward processing. Now,  
406 we turn to also test whether any such potential effects could be demonstrated on the implementation of  
407 chosen behavior in the brain. For this purpose, we assessed which brain regions encoded the chosen tasks.  
408 Two GLMs were estimated for each subject, one modelling task-related brain activity at the time of  
409 decision-making, and one modelling activity during a subsequent maintenance phase. It has been shown  
410 that formation and maintenance of intentions rely on partly dissociable brain networks (Bunge et al.,  
411 2003; Gilbert, 2011), and our design allowed us to estimate independent signals related to both epochs  
412 as they were separated by a variable inter-trial-interval.

413 In the first GLM (GLM<sub>maintenance</sub>), for each of the 5 runs we added regressors for each combination of chosen  
414 task (task X, task Y) and reward contingency (CR, NCR). All 4 regressors were locked to the cue onset, the

415 duration was set to cover the whole delay period. Please note that due to the jittered delay period  
416 duration, the modelled signals were dissociated from the task execution and feedback presentation.  
417 These boxcar regressors were then convolved with a canonical haemodynamic response function. This  
418 model is highly similar to the model used in (Wisniewski et al., 2016), where subjects were also free to  
419 choose one of two different tasks in each trial, making current results highly comparable to this previous  
420 study. In sum, this model estimated task-specific brain activity during intention maintenance, i.e. while  
421 subjects had to represent their intention to perform a specific chosen task, without yet being able to  
422 prepare a specific motor response. A second GLM was estimated ( $GLM_{\text{decisiontime}}$ ), in order to extract task-  
423 specific brain activity at the time subjects made their choice which of the two tasks to perform. Note that  
424 although the cue suggested that subjects should make a task choice at that point in time, there is no strong  
425 way of controlling the exact point in time at which choices were made. In fact, choices could have been  
426 made earlier than the presentation of the choice cue. It has been shown before that under free choice  
427 conditions, subjects choose a task as soon as all necessary information to make a choice is available  
428 (Hampton and O'Doherty, 2007; Wisniewski et al., 2015b). In this experiment, this time point is the  
429 feedback presentation of the previous trial. At this point, subjects can judge whether they e.g. chose the  
430 HR or LR task and determine which of the two tasks to perform in the next trial. We used this approach  
431 successfully in a previous experiment (Wisniewski et al., 2015b), again making current results highly  
432 comparable with these previous findings. All further task decoding analyses were performed on both  
433 GLMs.

434 *Baseline decoding:* The task decoding analyses followed the same logic as the reward outcome analyses  
435 described above. We first performed a searchlight decoding analysis (radius = 3 voxels,  $C = 1$ ), contrasting  
436 parameter estimates for tasks X and Y in all trials (CR and NCR combined). This analysis has the maximum  
437 power to detect any brain regions containing task information, which can be notoriously difficult  
438 (Bhandari et al., 2018). Resulting accuracy maps were normalized, smoothed (6mm FWHM), and entered

439 into a random effects group analysis (t-test vs chance level, 50%). Results were thresholded at  $p < 0.001$   
440 (uncorrected) at the voxel level, and  $p < 0.05$  (family-wise error corrected) at the cluster level. Again,  
441 regions surpassing this threshold were used to define functional regions-of-interest for the following  
442 decoding analyses (see Loose et al., 2017).

443 *Differences in task coding:* In order to assess whether task coding is modulated by reward contingency,  
444 we repeated the decoding analysis separately for CR and NCR trials. If contingent rewards indeed increase  
445 task shielding in the brain, we should see higher accuracies in the CR than in the NCR decoding analysis.  
446 This effect should be especially pronounced if both tasks are similar and easily confused, which is the case  
447 in our experiment. Please note, that we again only used half the number of trials as before, reducing the  
448 signal-to-noise ratio in these analyses. We thus expected lower statistical power and smaller effects.

449 *Similarities in task coding:* Some previous work suggests that tasks are encoded in a context-invariant  
450 format in the brain (Zhang et al., 2013; Wisniewski et al., 2016), and we directly tested whether this was  
451 also true in this experiment. Using a cross-classification (xclass) approach, we trained a classifier on CR  
452 trials and then tested it on NCR trials (and vice versa). And brain regions showing above chance decoding  
453 accuracies in this analysis provides positive evidence of task coding that is invariant with respect to  
454 contingent vs non-contingent reward outcomes.

455 *Region of interest analyses:* We also assessed task information in a number of a priori defined regions of  
456 interest (ROI). First, we attempted to replicate results from one of our previous experiments (Wisniewski  
457 et al. 2015). There, the dmPFC has been found to encode task choices at the time of decision-making. We  
458 extracted this functional ROI, and tested whether we could replicate the finding in this independent and  
459 larger sample. Although the overall design differed considerably (e.g. 3 vs 2 tasks, changing reward  
460 outcomes vs changing task difficulty), both studies used the same object-categorization task. Second, two  
461 previous experiments found task information to be maintained in the fronto-parietal cortex in a context

462 invariant fashion (Loose et al. 2017; Wisniewski et al. 2016). In one paper, task coding was invariant with  
463 respect to freely chosen vs. externally cued tasks (Wisniewski et al. 2016), while in the other paper, task  
464 coding was invariant with respect to high vs. low control demands (Loose et al. 2017). If we were to show  
465 that the regions identified in these two experiments also encode tasks invariantly across reward  
466 contingency conditions, that would provide additional evidence for general, context invariant task coding  
467 in the fronto-parietal cortex. We thus extracted functional ROIs from both papers (Wisniewski et al. 2016:  
468 left parietal cortex, left PFC, Brodman area 8; Loose et al. 2017: left parietal cortex, left PFC), and tested  
469 this hypothesis in this independent data-set. For all ROIs defined, we extracted accuracy values for all  
470 voxels within the ROI, which were then averaged. One-sided Bayesian t-tests across subjects were  
471 performed to assess whether they were above chance.

472 *Control analyses:* In order to further corroborate the reliability of our results, we performed a number of  
473 control analyses. It has been pointed out before, that RT effects might partly explain task decoding results  
474 (Todd et al., 2013), although others were unable to show any such effects (Woolgar et al., 2014;  
475 Wisniewski et al., 2015b). Given that we expected RTs to differ across reward conditions, we decided to  
476 conservatively control for RTs effects. First, we repeated the GLM estimation, only adding reaction times  
477 as an additional regressor of non-interest. We then repeated the main decoding analyses, and tested  
478 whether accuracy values differed significantly. If RTs indeed explain our task decoding results, we should  
479 see a reduction in decoding accuracies when RT effects were regressed out of the data.

480 Furthermore, it is possible that some subjects exhibit excessive error rates or have a strong bias to choose  
481 one task more often than the other. High error rates might decrease the signal-to-noise ratio and thus  
482 affect observed results. Very strong choice biases might have a similar effect, in extreme cases subjects  
483 might have performed only one of the two tasks in a given run (although this was unlikely). In order to  
484 ensure that we had enough trials to estimate each regressor, we first excluded subjects with excessively  
485 high error-rates (more than 1.5\*IQR above average), and then excluded subjects with strong choice biases

486 (more than 1.5\*IQR above average). We then tested whether each regressor in all remaining subjects  
487 could be estimated from at least 6 trials. If a regressor could only be estimated from fewer trials, that run  
488 was excluded from the analysis. Subjects in which more than 1 run was thusly excluded were altogether  
489 excluded from the analysis. These criteria were highly similar to the criterion used in (Wisniewski et al.,  
490 2015b), which proved an effective control. After excluding these subjects, we repeated the main analyses  
491 on the remaining subjects and tested whether they differed from the analysis including all subjects.

492 Two further control analyses were performed to confirm the validity of the decoding procedure used.  
493 First, we performed a ROI decoding analysis on a brain region that is not related to task-performance in  
494 any way, expecting accuracies to be at chance level. We chose the primary auditory cortex for this  
495 purpose, defined using the WFU\_pickatlas tool ([https://www.nitrc.org/frs/?group\\_id=46](https://www.nitrc.org/frs/?group_id=46), RRID:  
496 SCR\_007378). Second, we tested whether our chance level was indeed 50%, or whether it was biased. For  
497 this purpose, we performed a permutation analysis (as implemented in the Decoding Toolbox). We  
498 repeated the baseline decoding analysis 1000 times for each subject, only randomly assigning the test  
499 labels in each of the 1000 permutations. A null distribution was calculated from these permutations  
500 separately for each subject, and the mean accuracy value of the null distribution served as an empirical  
501 estimate of the chance level. In order to test whether the estimated chance level deviated from 50%, we  
502 performed a two-sided Bayesian t-test. Additional exploratory analyses were performed to assess possible  
503 correlations between behavioral measures, questionnaires, and fMRI results (Figure 2–1).

504

## 505 Results

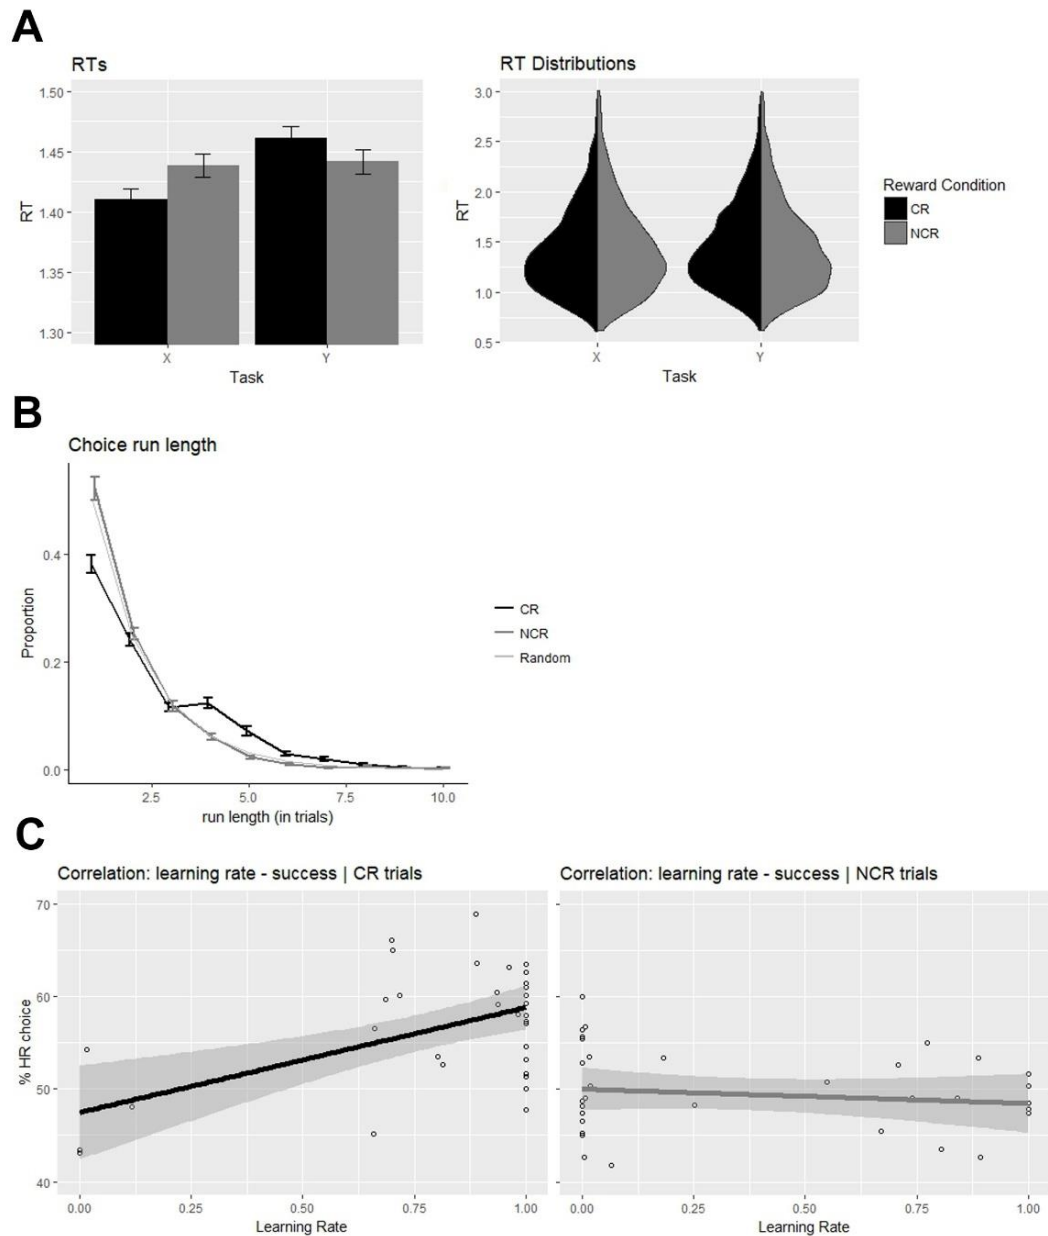

506

507 **Figure 2. Behavioral Results. A.** Reaction Times (RT). The bar graph depicts the average reaction times for  
508 each combination of task and reward condition. Contingent (CR) trials are shown in black, non-contingent  
509 (NCR) trials are shown in grey. The violin plot depicts the RT distributions of the same data. **B.** Choice run  
510 length. This plot depicts the distribution of run lengths (the number of consecutive trials in the same task).  
511 Data from CR trials is shown in black, data from NCR trials is shown in grey. The expected distribution if  
512 choices were completely random is depicted in light grey. All error bars depict the SEM. **C.** Correlation of  
513 learning rate and success. Learning rates were extracted from a fitted RL model. Success was measured  
514 as % HR task choices. In CR trial, subjects who learned the changing reward contingencies quickly, were

515 more successful. In NCR, no such correlation was observed. Each dot represents one subject, and linear  
516 functions were fitted to the data (lines). Further information on correlations between performance and  
517 additional questionnaire measures can be found in Supplementary Figure 1.

518

## 519 Behavioral results

520 We first assessed the effects of tasks (X, Y) and reward condition (CR, NCR) on error rates and reaction  
521 times (RT). The average error rate across all subjects was 5.89% (SEM = 0.74%). Thus, subjects were able  
522 to perform the task accurately. There was no evidence for an effect of reward condition on error rates  
523 (Bayes Factor (BF<sub>10</sub>) = 0.88,  $t(34) = 1.96$ ,  $p = 0.06$ ). Error trials were removed from all further analyses. A  
524 repeated-measures ANOVA on the reaction times (RT) including the factors task and reward condition  
525 revealed no main effect of reward (BF<sub>01</sub> = 31.95,  $F(1,34) = 0.38$ ,  $p = 0.53$ , Figure 2 A). This is likely due to  
526 the fact that subjects had a long time to prepare the execution of the task, which minimized potential  
527 contingency-related differences in RTs. There was a strong main effect of task however (BF<sub>10</sub> > 150,  
528  $F(1,34) = 3.78$ ,  $p = 0.05$ ), with task X (RT<sub>X</sub> = 1415ms, SEM = 29ms) being faster than task Y (RT<sub>Y</sub> = 1467ms,  
529 SEM = 35ms). Please note, that this cannot be simply due to a difficulty difference between the two S-R-  
530 mappings called task X and task Y, as the specific S-R-mappings were counter-balanced across subjects.  
531 Given the long delay phase, subjects should have had enough time to prepare both tasks well, and we  
532 were somewhat surprised to see this RT difference. This results might reflect the encoding sequence in  
533 the learning phase. Subjects might have learned the S-R-mapping labelled X first, and then learned the S-  
534 R-mapping labelled Y second. If the second task is mainly encoded by how it differs from the first, this  
535 might lead to a RT difference (see also Lien et al., 2005). There was no evidence for an interaction between  
536 task and reward (BF<sub>10</sub> = 0.26,  $F(1,34) = 6.63$ ,  $p = 0.01$ ).

537 We then assessed whether subjects showed choice biases towards one of the two tasks, which might  
538 indicate stable preferences for specific tasks and might in turn affect fMRI analyses (see below). In order  
539 to quantify any potential choice biases, we computed the percentage of task X choices for both reward



540 conditions separately. Subjects chose task X in 52.14% (SEM = 1.44%) of the CR trials, and 52.29% (1.72%)  
541 of the NCR trials. These values did not differ from 50% in the CR condition ( $BF_{10} = 0.48$ ,  $t(34) = 1.47$ ,  $p =$   
542  $0.14$ ), and NCR condition ( $BF_{10} = 0.40$ ,  $t(34) = 1.32$ ,  $p = 0.19$ ). There was also no difference between the  
543 two reward conditions ( $BF_{01} = 5.45$ ,  $t(34) = 0.14$ ,  $p = 0.88$ ), indicating that subjects did not exhibit strong  
544 choice biases in this experiment.

545 Next, we measured subjects' success in solving the reversal learning task presented in CR trials, by  
546 computing the percentage of high-reward (HR) task choices for each subject. If they were unable to learn  
547 which of the two tasks was the HR task, this value should be 50%. Higher values indicate increasing success  
548 in performing the reversal learning task. We hypothesized that subjects chose HR tasks more often in CR,  
549 as compared to NCR trials. Subjects chose the HR task in 56.40% (SEM = 1.15%) of the CR trials, which was  
550 above chance level ( $BF_{10} > 150$ ,  $t(34) = 5.56$ ,  $p < 0.001$ ). They chose the HR task in 49.47% (SEM = 0.84%)  
551 of the NCR trials, which did not differ from the chance level ( $BF_{01} = 4.59$ ,  $t(34) = 0.62$ ,  $p = 0.53$ ).  
552 Importantly, we found strong evidence for our hypothesis that subjects chose HR tasks more often in the  
553 CR, than in the NCR condition ( $BF_{10} > 150$ ,  $t(34) = 5.44$ ,  $p < 0.001$ ). These findings demonstrate that  
554 subjects indeed chose tasks strategically in the CR condition, in order to maximize their reward outcome.

555 We then described the learning process in the CR trials in more details by fitting a reinforcement learning  
556 (RL) model (Sutton and Barto, 1990, see Materials and Methods for more details) to the choice data of  
557 each subject, and extracting the estimated learning rate ( $\alpha$ ). We expected subjects to show high learning  
558 rates in CR trials, reflecting the fact that subjects frequently needed to update which of the two tasks  
559 yielded higher reward outcomes. We compared fitted models in both CR and NCR trials to a null model,  
560 in which the learning rate was fixed to 0, assuming that subjects never learned about the reward  
561 contingencies in this experiment. Model fit was assessed using the AIC and BIC (Burnham and Anderson,  
562 2004). As expected, the RL model provided a better fit to the data than the null model in both CR trials  
563 ( $AIC_{RL\_CR}=129.97$ ,  $AIC_{NULL\_CR}=159.54$ ,  $BIC_{RL\_CR}=132.71$ ,  $BIC_{NULL\_CR}=159.54$ ), as well as NCR trials

564 (AIC<sub>RL\_NCR</sub>=158.70, AIC<sub>NULL\_NCR</sub>=158.90, BIC<sub>RL\_NCR</sub>=132.71, BIC<sub>NULL\_NCR</sub>=158.90). Given that reward  
565 contingencies changed frequently in the CR trials, we expected learning rates to be higher in CR than in  
566 NCR trials. We found strong evidence in favor of this hypothesis ( $\alpha_{CR}$ : mean = .78, median = .96, sd = .33,  
567 min/max = <.001/1;  $\alpha_{NCR}$ : mean = .36, median = .06, sd = .41, min/max = <.001/1; BF<sub>10</sub> > 150, t(34) = 4.63,  
568 p < 0.001). We then correlated estimated learning rates with successful task performance (% HR task  
569 choices), again using a Bayesian framework for correlation estimation (using *bayes.cor.test* from the  
570 BayesianFirstAid package in R). Specifically, we estimated the probability of the correlation being above 0  
571 ( $p(r>0)$ ), and also estimated 95% credible intervals (95% CI), which indicates the range of values within  
572 which the correlation falls with a 95% probability. If this interval did not include 0, we interpreted the  
573 correlation as either positive or negative. The estimated learning rate in CR trials was indeed correlated  
574 with successful task performance (% HR task choices),  $r = .44$  (95% CI = [.026, .74],  $p(r>0) = .97$ , Figure 2  
575 C), linking our computational modelling more closely to behavior. As a control analysis, we also correlated  
576 learning rate in NCR with proportion of HR task choices in NCR trials. As expected, we found no correlation,  
577  $r = -.12$  (95% CI = [-.46, .21],  $p(r>0) = .21$ ). Classically estimated correlations confirmed these results,  $r = .56$ ,  
578  $p < 0.001$ , and  $r = -.12$ ,  $p = 0.46$ , respectively. These results indicate that successful subjects were able to  
579 learn about changing reward contingencies more quickly, and also demonstrate that subjects treated both  
580 reward conditions differently.

581 Lastly, in NCR trials we expected subjects to choose tasks randomly, as their choices had no effect on  
582 reward outcomes (see Materials and Methods for more details). In order to test this, we computed the  
583 run length for each subject, i.e. the average number of consecutive trials in the same task (Arrington and  
584 Logan, 2004). The average run length was then compared to the expected theoretical distribution if  
585 choices were fully random (Figure 2 B). The average run length in NCR trials was 1.95 trials (SEM = 0.07  
586 trials), which did not differ from the expected 'random-choice' run length (BF<sub>01</sub> = 4.85, t(34) = 0.52, p =  
587 0.60). Subjects in this experiment thus did not exhibit repetition bias, which has been reported previously

588 for free-choice tasks (Arrington and Logan, 2004). The average run length in CR trials was 2.54 trials (SEM  
589 = 0.08 trials), which was longer than in NCR trials ( $BF_{10} > 150$ ,  $t(34) = 5.91$ ,  $p < 0.001$ ), demonstrating that  
590 subjects stayed longer in the same task. This is a viable strategy in the reversal-learning task they  
591 performed. Once they identified which was the HR task, repeatedly performing that task maximized  
592 reward outcomes.

## 593 Reward-related brain activity

### 594 Multivariate decoding of reward outcome values

595 One of our main goals was to assess whether reward contingency affects valuation processes in the brain.  
596 In a first analysis, we aimed to extend previous findings demonstrating an effect of reward contingency  
597 on the processing of its hedonic value (Elliott et al., 2004). For this purpose, identified brain regions  
598 encoding outcome values (high vs low) at the time of feedback presentation. We found an extensive  
599 network to encode outcome values including subcortical brain regions, as well as large parts of the  
600 prefrontal and parietal cortex (Figure 3 A). Please note that this contrast might not *only* capture specific  
601 reward value signals, it might also reflect effects caused by differences in reward outcomes, like attention  
602 or motor preparation. We explicitly assessed whether reaction times affected outcome coding (see Todd  
603 et al., 2013), and found no effect (Figure 3-1). Subsequently, we assessed whether these outcome signals  
604 were modulated by reward contingency, hypothesizing that contingent rewards showed stronger  
605 decoding results than non-contingent rewards. For this purpose, we repeated the decoding analysis  
606 described above, now separately for CR and NCR trials, respectively. The two resulting accuracy maps  
607 were entered into a within-subjects ANOVA, and a contrast was computed identifying brain regions with  
608 higher accuracies in CR than in NCR trials. Using small-volume correction ( $p < 0.001$  uncorrected,  $p < 0.05$   
609 FWE corrected), we assessed which of the brain regions identified in the *baseline* analysis also showed  
610 stronger value coding for contingent rewards. We found the striatum, bilateral lateral PFC, dACC, anterior

611 medial PFC, and IPS to show stronger reward value coding for contingent rewards, as compared to non-  
612 contingent rewards. In a last step, we directly assessed whether there were brain regions that encoded  
613 reward values in a contingency-invariant fashion, using a cross-classification approach. Here, we trained  
614 a classifier to distinguish high from low rewards only on CR trials, and then tested its performance on NCR  
615 trials, and vice versa. This allowed us to identify brain regions in which outcome values are encoded  
616 invariantly across the two contingency conditions, i.e. where neural patterns do not differ across  
617 contingency conditions (Kaplan et al., 2015). We found the striatum, lateral and medial PFC, dACC, and  
618 IPS to encode rewards in a contingency invariant form. This pattern of results suggests that the neural  
619 code for different reward values did not change across contingency conditions, yet value signals were still  
620 stronger in CR than in NCR trials. This is compatible with an increased gain or amplification of value  
621 representations through contingency (Figure 3 B), where representations do not change but become more  
622 separable in neural state space (see Waskom et al., 2014 for a similar argument).

623

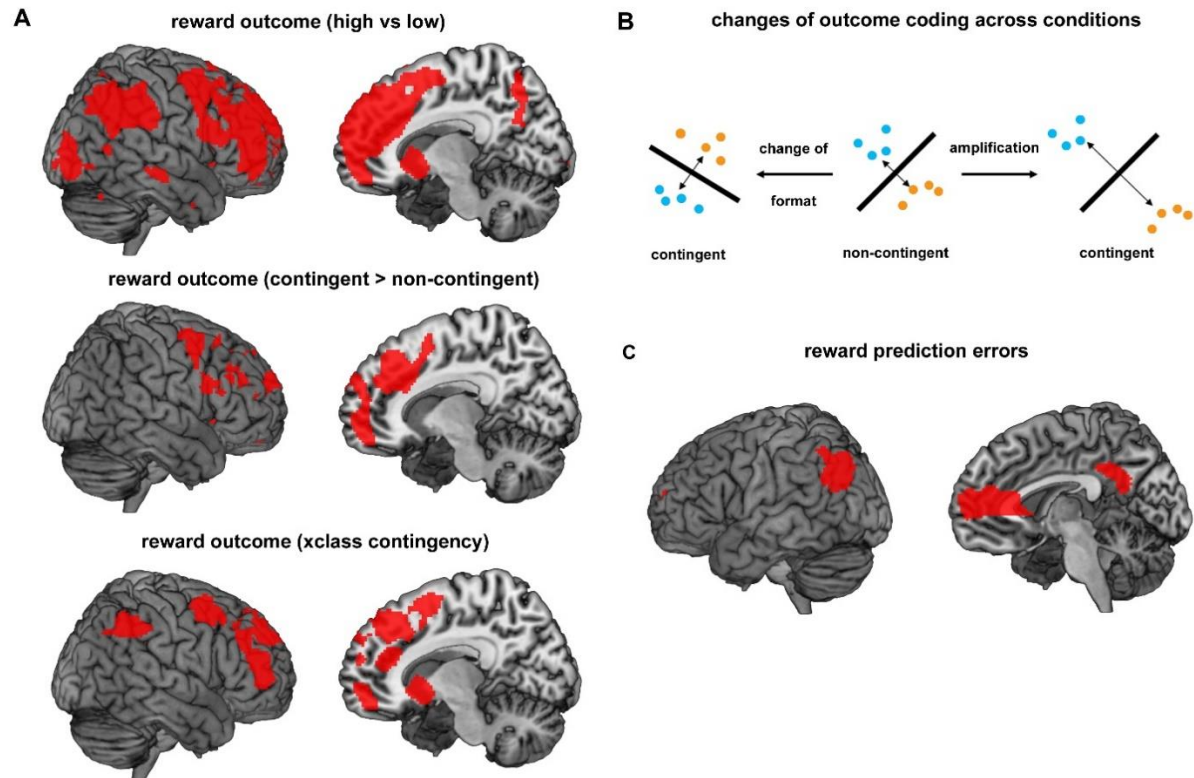

624

625 **Figure 3: Reward-related brain activity.** **A.** Multivariate decoding of reward outcome value. Above:  
626 baseline decoding. Depicted are regions that encoded the value of reward outcomes (high vs. low). The  
627 regions identified were used as masks for the following analyses. Results are displayed at  $p < 0.05$  (FWE  
628 corrected). Middle: regions with a stronger coding of reward value in contingent (CR) than in non-  
629 contingent (NCR) trials. Below: regions encoding reward values in similar formats in both contingency  
630 conditions, as tested using a cross-classification (xclass) analysis. We also repeated this analysis, explicitly  
631 controlling for the effect of reaction times, and results can be found in Supplementary Figure 2. **B.**  
632 Amplification vs change of format of neural coding. Most regions identified in A showed both stronger  
633 decoding in CR trials, and similar formats across both contingency conditions. This is compatible with an  
634 amplification or gain increase of neural codes. In the middle, a hypothetical example of a pattern decoding  
635 is depicted. High reward trials are depicted as blue, low reward trials as orange dots. The classifier fits a  
636 decision boundary to separate the two distributions. If this code changes between the two contingency  
637 conditions (left), decoding is still possible at similar accuracy levels as before, but a classifier trained on  
638 NCR trials will be unsuccessful in classifying CR trials. If this code is amplified in the CR condition however  
639 (right), the same classifier can will be successful in both conditions. Accuracies increase, as the two  
640 distributions become more separable. **C.** Brain regions correlating with reward prediction error signals (in  
641 both CR and NCR trials).

642

643

## 644 Learning signals: Reward prediction errors

645 In the previous analysis, we assessed which brain regions directly encoded different reward outcomes in  
646 individual trials. We now turn to identifying brain regions supporting reward-based learning processes  
647 across multiple trials. We used the fitted RL models (see above) to extract trial-by-trials reward prediction  
648 errors (RPEs), which signal the need to adapt one's behavior (O'Reilly et al., 2013). Following a model-  
649 based neuroscience approach (Forstmann and Wagenmakers, 2015), we identified brain regions in which  
650 activity correlated with RPEs. These learning signals should be strongest at the time of decision-making  
651 (in our case the reward feedback presentation, see Materials and Methods for more details), and we  
652 found the left parietal cortex and anterior medial PFC to correlate with RPEs in CR trials (Figure 3 C). In  
653 NCR trials, we found anterior cingulate and anterior medial prefrontal cortex to encode RPEs. We  
654 statistically assessed the difference between these two results, using a within-subjects ANOVA with the  
655 factor 'model' (2 levels). We found no significant differences ( $p < 0.001$  (uncorrected) at the voxel level,  $p$   
656  $< 0.05$  (FWE corrected) at the cluster level), and thus decided to combine both conditions to increase  
657 statistical power. Running the same analysis over all trials (CR and NCR) again revealed the left parietal  
658 cortex (overlapping with the region identified in Analysis 1), ACC and anterior medial PFC, but also the  
659 precuneus. These regions thus signal discrepancies between expected and received rewards during  
660 feedback presentation, indicating the need to adapt behavior in the subsequent trial.

661 These brain regions could either signal general surprise, as RPEs are the difference between expected and  
662 received rewards (O'Reilly et al., 2013). They could also signal the need to update an internal model of  
663 our environment. Our findings are more in line with the former option. Any region signaling the need to  
664 update the internal model of the environment should be specifically involved only in CR trials (where  
665 updating is required), and not in NCR trials (where updating is not needed). In order to test this, we  
666 identified subjects that only showed high learning rates in CR and low learning rates in NCR trials ( $n=19$ ).  
667 For these subjects, prediction errors only signaled the need to update their internal model. Results

668 showed that for this subset of subjects, only the anterior medial PFC correlated with RPEs ( $p < 0.001$   
669 uncorrected at the voxel, and  $p < 0.05$  FWE corrected at the cluster level). This seems to suggest that the  
670 anterior medial PFC was involved in model updating, while the left parietal cortex and precuneus signaled  
671 general surprise. Given that the sample size was considerably smaller in this analysis, results should be  
672 interpreted with caution however.

### 673 **Multivariate decoding of tasks**

674 *Baseline decoding analysis:* The previous analysis demonstrated that reward contingency indeed affected  
675 the neural processing of the hedonic value of reward outcomes, and possibly also related learning signals.  
676 In the following analysis we assessed whether these effects propagated to the implementation of chosen  
677 behavior, i.e. the coding of chosen tasks as well. For this purpose, we first estimated a GLM modelling  
678 task-related neural activity during the maintenance of chosen tasks, from the onset of the ‘choose’ cue to  
679 the onset of the task execution screen. (see Materials and Methods for more details, and Haynes et al.  
680 (2007) for a similar approach). During this time, subjects needed to maintain their intention to perform  
681 one of the two tasks. We performed a searchlight decoding analysis contrasting task X and task Y,  
682 combining both CR and NCR trials in order to maximize the power to detect any brain regions containing  
683 task information (see Loose et al., 2017 for a similar approach). Please note that during this time subjects  
684 cannot prepare specific motor responses yet, but they can use this time to retrieve the current S-R-  
685 mapping. We found two brain regions to contain task information, the left posterior parietal cortex (mean  
686 accuracy = 4.61%, SEM = 0.65%), spanning over the midline into the right parietal cortex, and the right  
687 anterior middle frontal gyrus (aMFG, mean accuracy = 4.66%, SEM = 0.89%, see Figure 4 A, Table 1).  
688 Interestingly, the parietal cluster identified in this analysis partly overlapped with the parietal cluster  
689 found to encode reward prediction errors in the previous analysis, suggesting that the left parietal cortex  
690 is involved in both reward-learning and task processing.

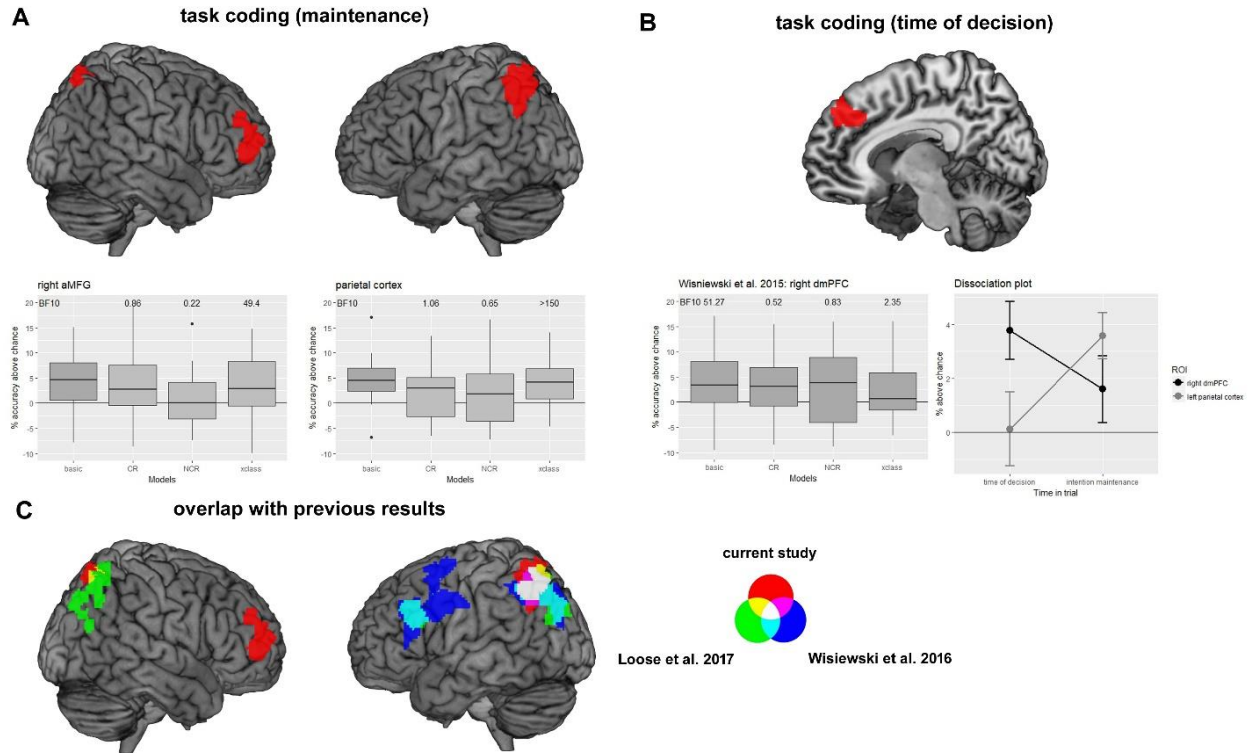

691

692 **Figure 4: Task coding. A.** Task coding during maintenance. Results from the baseline decoding analysis are  
 693 depicted above. Two clusters passed the significance threshold, one in the parietal cortex, and one in the  
 694 right anterior MFG. These two clusters were then used as ROIs, and accuracies were extracted for the  
 695 contingent (CR), non-contingent (NCR), and cross-classification (xclass) task decoding analyses. Results  
 696 can be seen below. Above the boxplots, Bayes factors (BF10) of a t-test vs. chance level are shown. Please  
 697 note, that we do not report BF10 for the baseline analysis, as this analysis was used to define the ROIs,  
 698 and running additional statistical tests on this data would constitute double dipping. **B.** Task coding at the  
 699 time of decision-making. Above the ROI in the right dmPFC used in this analysis from Wisniewski et al.  
 700 (2015) is depicted. This study demonstrated that the right dmPFC encodes tasks at the time of decision-  
 701 making. The box plot depicts results from our data in this ROI, for all four analyses performed (baseline,  
 702 CR, NCR, xclass). We largely replicate these previous findings. The dissociation plot depicts a double  
 703 dissociation between two ROIs (right dmPFC, as defined using data from Wisniewski et al., 2015, and the  
 704 left parietal cortex, as defined using data from Wisniewski et al., 2016), and two time points in the trial  
 705 (time of decision-making, maintenance). It can be seen that the dmPFC only encodes tasks at the time of  
 706 decision-making, while the left parietal cortex only encodes tasks during the maintenance phase. All error  
 707 bars represent SEM. **C.** Overlap with previous results. Results from the current study (red) are overlain on  
 708 previous findings from Wisniewski et al. 2016 (blue), and Loose et al. 2017 (green). All results are based  
 709 on task decoding analyses (searchlight decoding, radius = 3 voxels,  $C = 1$ , chance level = 50%), albeit with  
 710 different specific tasks being contrasted in each study. Despite this fact, all three studies find task  
 711 information around the intraparietal sulcus. Findings in the PFC are less consistent. We further assessed  
 712 task information encoded throughout the multiple-demand network, results can be found in  
 713 Supplementary Figure 3.



714 **Table 1: Baseline task decoding**

| Brain region    | Side      | Cluster size | Mean accuracy (SEM) | MNI coordinates (peak) |     |    |
|-----------------|-----------|--------------|---------------------|------------------------|-----|----|
|                 |           |              |                     | X                      | Y   | Z  |
| parietal cortex | Bilateral | 2427         | 4.61% (0.65%)       | -10                    | -60 | 60 |
| anterior MFG    | Right     | 955          | 4.66% (0.89%)       | 32                     | 58  | 18 |

715 Results are shown for a statistical threshold of  $p < 0.001$  (uncorrected) at the voxel level and  $p < 0.05$  (FWE  
716 corrected) at the cluster level.

717

718 *Differences in task coding:* In a next step, we assessed whether tasks were encoded with a higher accuracy  
719 in CR, than in NCR trials, similar to what we found for reward outcomes. Previous research demonstrated  
720 higher decoding accuracies in rewarded, as compared to non-rewarded tasks (Etzet et al., 2016). We built  
721 functional ROIs from the two regions identified in the baseline analysis, and extracted the average  
722 accuracy values for the task decoding analyses performed on CR trials only, and NCR trials only. Please  
723 note that these two analyses use only half as many trials as the baseline analysis, and the signal-to-noise-  
724 ratio can be expected to be lower. We found no task information in the parietal cortex in these two  
725 analyses (CR: 1.29%, SEM = 0.91%, BF10 = 1.06,  $t(34) = 1.59$ ,  $p = 0.06$ ; NCR: 1.73%, SEM = 1.44%, BF10 =  
726 0.64,  $t(34) = 1.23$ ,  $p = 0.11$ ), and found no evidence for stronger task coding in CR than in NCR trials (BF10  
727 = 0.16,  $t(34) = 0.09$ ,  $p = 0.53$ ). A similar pattern of results was found in the right aMFG (CR: 1.79%, SEM =  
728 1.37%, BF10 = 0.85,  $t(34) = 1.44$ ,  $p = 0.07$ ; NCR: 0.48%, SEM = 1.35%, BF10 = 0.22,  $t(34) = 0.25$ ,  $p = 0.40$ ;  
729 CR > NCR: BF10 = 0.40,  $t(34) = 0.84$ ,  $p = 0.20$ ). Thus, we find no evidence for an effect of reward  
730 contingency on task representations, despite the fact that behavior clearly differed between the two  
731 reward conditions, and that contingency has been found to modulate the coding of reward outcomes. In  
732 order to assess whether the lack of evidence for differences in task coding might stem from a lack in

733 statistical power, we performed an additional control analysis. We again performed two separate task  
734 decoding analysis, only using high reward and low reward trials (instead of CR and NCR trials), respectively.  
735 We then tested whether decoding accuracies differed between these two conditions. Importantly, this  
736 analysis has a similar statistical power, as the same number of trials is used. And indeed, we found task  
737 coding to differ between these two conditions even at the whole brain level ( $p < 0.001$  uncorrected at the  
738 voxel, and  $p < 0.05$  FWE corrected at the cluster level). Please note that this comparison might confound  
739 effects of reward value with attentional processes. Nevertheless, this shows that our analysis approach is  
740 able to identify differences in task coding in this dataset, although it fails to do so for our reward  
741 contingency manipulation.

742 *Similarities in task coding:* We also directly tested whether task representations were invariant across the  
743 two reward conditions, using a cross-classification approach. We trained a classifier to distinguish tasks in  
744 CR trials, and tested its performance in NCR trials, and vice versa. In this analysis, accuracies can only be  
745 above chance if task coding is invariant across both conditions. Results indicate that both the parietal  
746 cortex (4.03%, SEM = 0.76%,  $BF_{10} > 150$ ), as well as the right aMFG (3.71%, SEM = 1.16%,  $BF_{10} = 49.39$ )  
747 show this type of contingency-invariant task coding. We further tested whether accuracies in the cross-  
748 classification differed from the baseline accuracies, finding moderate evidence for an absence of any  
749 differences (parietal cortex  $BF_{01} = 4.34$ ,  $t(34) = 0.71$ ,  $p = 0.47$ , aMFG  $BF_{01} = 3.94$ ,  $t(34) = 0.84$ ,  $p = 0.40$ ).  
750 These results thus show that the parietal cortex and aMFG encode tasks using a general, reward-  
751 contingency-invariant format.

752 *ROI analyses and replications:* We also tested for task information in several a-priori ROIs, taken from two  
753 previous experiments (Loose et al. 2017, Wisniewski et al. 2016), which tested for effects of cognitive  
754 control, and free choice on task coding, respectively. Both previous studies found the left parietal cortex  
755 to be involved in context-invariant task coding, and we thus set out to replicate these previous results  
756 here. We extracted the ROIs reported in these two studies, and extracted decoding accuracies in each of

757 these ROIs, for all 4 analyses performed here (baseline, CR, NCR, xclass). We were able to replicate Loose  
758 and colleagues' left parietal results (baseline BF10 = 133.69,  $t(34) = 3.89$ ,  $p < 0.001$ ; CR BF10 = 0.68,  $t(34)$   
759 = 1.23,  $p = 0.10$ ; NCR BF10 = 0.54,  $t(34) = 1.11$ ,  $p = 0.13$ ; xclass BF10 = 33.17,  $t(34) = 3.33$ ,  $p = 0.001$ ).  
760 Although somewhat weaker, we also replicated their right parietal results (baseline BF10 = 8.49,  $t(34) =$   
761 2.72,  $p = 0.004$ ; CR BF10 = 0.77,  $t(34) = 1.37$ ,  $p = 0.08$ ; NCR BF10 = 0.14,  $t(34) = 0.28$ ,  $p = 0.61$ ; xclass BF10  
762 = 8.10,  $t(34) = 2.70$ ,  $p = 0.005$ ). However, we were unable to detect task information in left PFC (baseline  
763 BF10 = 0.49,  $t(34) = 1.03$ ,  $p = 0.15$ ; CR BF10 = 0.21,  $t(34) = 0.23$ ,  $p = 0.40$ ; NCR BF10 = 0.44,  $t(34) = 0.93$ ,  $p$   
764 = 0.17; xclass BF10 = 0.29,  $t(34) = 0.54$ ,  $p = 0.29$ ), which is in line with the original paper, where PFC findings  
765 were also somewhat less robust. Additionally, we were able to replicate Wisniewski and colleagues' left  
766 parietal finding (baseline BF10 = >150,  $t(34) = 4.20$ ,  $p < 0.001$ ; CR BF10 = 0.80,  $t(34) = 1.40$ ,  $p = 0.08$ ; NCR  
767 BF10 = 0.47,  $t(34) = 1.00$ ,  $p = 0.16$ ; xclass BF10 = 87.28,  $t(34) = 3.72$ ,  $p < 0.001$ ), as well as left BA8 (baseline  
768 BF10 = 9.3,  $t(34) = 2.77$ ,  $p = 0.004$ ; CR BF10 = 0.39,  $t(34) = 0.83$ ,  $p = 0.20$ ; NCR BF10 = 0.36,  $t(34) = 0.76$ ,  $p$   
769 = 0.22; xclass BF10 = 3.09,  $t(34) = 2.22$ ,  $p = 0.16$ ), but not the left PFC (baseline BF10 = 0.59,  $t(34) = 1.17$ ,  
770  $p = 0.12$ ; CR BF10 = 0.37,  $t(34) = 0.78$ ,  $p = 0.21$ ; NCR BF10 = 0.16,  $t(34) = 0.15$ ,  $p = 0.56$ ; xclass BF10 = 0.38,  
771  $t(34) = 0.81$ ,  $p = 0.21$ ). Thus, three studies with similar overall designs but considerable differences in the  
772 specific tasks used consistently find invariant task coding in the parietal, but not in the prefrontal cortex.  
773 Furthermore, Wisniewski et al. 2015 found task information at the time of decision-making in the right  
774 dorso-medial PFC (Figure 4 B). In order to replicate this finding, we repeated all 4 task decoding analysis,  
775 only looking at the time of decision-making instead of intention maintenance (which was the reward  
776 feedback presentation in this experiment, see Materials and Methods for more details). The right dmPFC,  
777 as identified by Wisniewski and colleagues, was found to encode tasks also in the current study (baseline  
778 3.76%, SEM = 1.07%, BF10 = 51.27,  $t(34) = 3.51$ ,  $p < 0.001$ , Figure 4 B). This was despite the fact that there  
779 were considerable differences in the overall experimental design of these two studies (e.g. 2 class vs. 3  
780 class decoding, changing reward outcomes vs. changing task difficulty). We found anecdotal evidence for

781 contingency-invariant task coding in this region (xclass 2.03%, SEM = 0.98%, BF10 = 2.35,  $t(34) = 2.07$ ,  $p =$   
782 0.02), although the baseline and xclass analyses did not differ (BF10 = 1.64,  $t(34) = 1.63$ ,  $p = 0.11$ ).  
783 Interestingly, the dmPFC was also found to encode reward outcome values, with its outcome signal being  
784 amplified by our contingency manipulation (Figure 3 A). This region thus simultaneously encoded both  
785 reward outcomes and the choices informed by these outcomes, highlighting its role in linking value to  
786 intention processing in the brain. Additionally, we found a double dissociation in task coding between the  
787 right dmPFC and left parietal cortex (Figure 4B), with the former only encoding tasks at the time of  
788 decision-making, and the latter only encoding tasks during intention maintenance. Please note that due a  
789 jittered inter-trial-interval, the decision-time and intention maintenance could be investigated  
790 independently. This dissociation was assessed statistically by performing an ANOVA on the accuracy  
791 values, using the factors 'time in trial' (time of decision vs intention maintenance) and 'ROI' (right dmPFC  
792 vs left parietal cortex). We found moderate evidence for a time x ROI interaction (BF10 = 5.39,  $F(1,34) =$   
793 10.49,  $p = 0.04$ ). Furthermore, the right dmPFC only encoded tasks at the time of decision (BF10 = 51.27,  
794  $t(34) = 3.51$ ,  $p < 0.001$ ), but not during intention maintenance (BF10 = 0.68,  $t(34) = 1.28$ ,  $p = 0.10$ ). The left  
795 parietal cortex only encoded tasks during intention maintenance (BF10 > 150,  $t(34) = 4.20$ ,  $p < 0.001$ ), but  
796 not at time of decision (BF10 = 0.19,  $t(34) = 0.09$ ,  $p = 0.46$ ). This double dissociation thus suggests a  
797 temporal order of task processing in the brain, with the medial PFC transiently encoding chosen tasks at  
798 the time of decision-making, and the left parietal cortex then maintaining that information until the tasks  
799 can be executed. Lastly, we also assessed task information throughout the multiple demand network  
800 (Duncan, 2010; Woolgar et al., 2015), and found tasks to be encoded in a contingency-invariant format  
801 (Figure 4-1).

802 *Control analyses:* In order to provide further support for our main results, we decided to perform a  
803 number of additional control analyses. First, we controlled for potential effects of RTs on task decoding  
804 results. It has been pointed out before, that task information in the brain can at least partly be explained

805 through RT effects (Todd et al., 2013). Although others have found no such effects (Woolgar et al., 2014),  
806 we decided to conservatively control for RT effects nonetheless, especially given that we found RT  
807 differences between tasks (see above). We thus repeated the task decoding analyses, only first regressing  
808 RT-related effects out of the data. We used the parietal and aMFG ROIs defined in the baseline analysis  
809 and tested whether task information was still present after controlling for potential RT effects. We still  
810 found the parietal cortex to encode tasks (4.61%, SEM = 0.65%, BF10 > 150,  $t(34) = 6.99$ ,  $p < 0.001$ ), and  
811 also found the task coding to be reward-invariant (4.03%, SEM = 0.76%, BF10 > 150,  $t(34) = 5.24$ ,  $p <$   
812  $0.001$ ). The same was true for the aMFG (4.66%, SEM = 0.89%, BF10 > 150,  $t(34) = 5.19$ ,  $p < 0.001$ ; and  
813 3.71%, SEM = 1.16%, BF10 = 23.38,  $t(34) = 3.18$ ,  $p = 0.001$ ; respectively). Results in the baseline and xclass  
814 analysis were equal in both regions, BF<sub>10</sub> >= 3.24,  $t(34) < 0.67$ ,  $p > 0.25$ . These results thus mirror the  
815 main analysis above, showing that RT-related variance cannot explain task decoding results in our  
816 experiment.

817 Although overall error rates were low and choice biases were largely absent, it was still possible that  
818 individual subjects showed excessively high error rates or strong choice biases, affecting task decoding  
819 results. The influence of individual subjects should be relatively small given our large sample size, but we  
820 still repeated the main analyses, excluding subjects with excessively high error rates and excessively  
821 strong choice biases. Additionally, we excluded subjects in which regressors could not be estimated from  
822 a sufficient number of trials (see Materials and Methods for more details). Using these highly conservative  
823 exclusion criteria, we removed an additional 12 subjects from the sample, leading to a sample size of 23  
824 subjects. Even though statistical power was considerably lower because of the smaller sample size, we  
825 were still able to detect task information in the parietal cortex (5.20%, SEM = 0.79%, BF10 >150,  $t(22) =$   
826  $6.54$ ,  $p < 0.001$ ), which was again reward-invariant (3.81%, SEM = 0.96%, BF10 = 96.61,  $t(22) = 3.93$ ,  $p <$   
827  $0.001$ ), and the same was true for the aMFG (5.03%, SEM = 1.09%, BF10 >150,  $t(22) = 4.60$ ,  $p < 0.001$ , and

828 3.71%, SEM = 1.39%, BF10 = 7.34,  $t(22) = 2.66$ ,  $p = 0.006$ , respectively). Therefore, neither error rates, nor  
829 choice biases can explain the reported task decoding results.

830 In order to validate the decoding procedure, we also extracted task decoding accuracies from a region not  
831 involved in performing this task, the primary auditory cortex. As expected, we found accuracies not to  
832 differ from chance level in this region (-0.36%, SEM = 0.93%, BF01 = 7.22,  $t(34) = 0.38$ ,  $p = 0.64$ ), showing  
833 that the task decoding analysis was not biased towards positive accuracy values. Lastly, we empirically  
834 estimated the chance level of our decoding analysis using permutation tests, in order to rule out a biased  
835 chance level. The estimated chance level was 49.98%, which did not differ from the theoretical chance  
836 level of 50% (BF01 > 150,  $t(34999) = 0.41$ ,  $p = 0.67$ ). Thus, comparing our decoding accuracies against a  
837 chance level of 50% was valid.

## 838 Discussion

839 Here, we investigated the effects of control over choice outcomes on outcome valuation and choice  
840 implementation. Subjects performed a probabilistic reward reversal learning task, in which they had  
841 control over the outcomes of their choices. They also performed a free choice task with non-contingent  
842 reward outcomes, in which outcomes were not under their direct control. Although we found reward  
843 contingency to modulate outcome valuation, we found no effects on choice implementation.  
844 Furthermore, we found two main brain regions to be crucial for encoding tasks and reward outcomes: the  
845 right dmPFC and the left parietal cortex (around the IPS). The dmPFC was found to encode chosen tasks  
846 at the time of decision-making, and simultaneously encoded reward outcome values, emphasizing its role  
847 in linking value-related with intentional control processes. While the parietal cortex encoded reward-  
848 prediction errors at the time of decision-making, it encoded chosen tasks during a subsequent  
849 maintenance phase. We found a double dissociation between both regions, with the dmPFC encoding  
850 tasks only at the time of decision-making, and the parietal cortex only during intention maintenance.

## 851 Control over choice outcomes affects outcome valuation but not choice implementation

852 Much previous research on the effects of reward motivation on cognition investigated the effects of  
853 reward prospect (Jimura et al., 2010; Dreisbach and Fischer, 2012). These findings demonstrated that  
854 positive reinforcement improves cognition, as compared to no reinforcement at all. However, an equally  
855 important and often overlooked property of reinforcement is the degree of control we have in reaching  
856 it. Sometimes, an action will cause on outcomes in a fairly clear way, other times, that link will be less  
857 close. Previous work on non-human primates has shown that the strength of such action-outcome  
858 contingencies modulates the neural processing of reward outcomes (Izquierdo et al., 2004; Chudasama  
859 et al., 2013). Our results show that this is also true in humans (see also Tricomi et al., 2004), and that  
860 neural representations of outcome values (and correlated processes) are amplified by reward  
861 contingency. Although somewhat weaker, evidence for reward learning signals points in the same  
862 direction. This is in line with predictions from gain-theories of motivation. It has been suggested that  
863 rewards increase the gain of subcortical dopaminergic neurons (Tobler et al., 2005), making them more  
864 sensitive to changes in rewards (see also Ikeda and Hikosaka, 2003; Thurley et al., 2008). We directly  
865 demonstrate such gain increases, in subcortical dopaminergic regions and beyond.

866 Importantly, in order for this value signal to lead to actual rewards, chosen behavior has to be  
867 implemented as intended first (see also Ruge et al., 2010). One might thus expect contingency to lead to  
868 stronger task shielding and coding (Dreisbach and Wenke, 2011), as the costs of confusing both tasks are  
869 potentially high. However, we found no evidence for such effects. On the contrary, we found evidence for  
870 a similar or invariant coding of tasks across both contingency conditions. This finding informs current  
871 debates on the nature of task coding in the brain. On the one hand, some have argued for flexible task  
872 coding especially in the fronto-parietal cortex (Woolgar et al., 2015; Qiao et al., 2017), often based on the  
873 multiple-demand network theory (Duncan, 2010). This account predicts that task coding should be  
874 stronger when task demands are high (Woolgar et al., 2015), or when correct performance is rewarded

875 (Etzet et al., 2016). Despite our efforts to replicate these findings in our data-set, we found no evidence  
876 for an influence of reward contingency on task coding. This was despite the fact that behavior differed  
877 between these conditions and that value-related signals were affected by reward contingency. One might  
878 argue that our analysis had insufficient statistical power to detect true effects, though we believe this to  
879 be unlikely. First, we decided to have a relatively large sample size (n=35). Second, additional control  
880 analyses showed that other analyses, matched for statistical power, do show significant results.

881 On the other hand, others have argued that the same task representations could be used in multiple  
882 different situations (i.e. ‘multiplexing’ of task information), and that this allows us to flexibly react to novel  
883 and changing demands (Botvinick and Cohen, 2014). Multiplexing predicts that task information should  
884 be invariant across different contexts (Levine and Schwarzbach, 2017), which has been shown previously  
885 (Zhang et al., 2013; Wisniewski et al., 2016; Loose et al., 2017). Here, we replicate and extend these  
886 findings, by showing that tasks are encoded in an outcome-contingency-invariant format in frontal and  
887 parietal brain regions, strengthening the idea of multiplexing of task information in the brain. One possible  
888 alternative explanation for this finding might be that subjects were highly trained in performing the two  
889 tasks, and were at their performance ceiling. This might make a modulation of task coding too small to  
890 detect. Although we cannot fully exclude this interpretation, we want to point out that contingency did  
891 have robust effects on behavior. Also, most related previous experiments trained their subjects, those  
892 who found effects (Woolgar et al., 2015; Etzel et al., 2016) and those that did not (Wisniewski et al., 2016).  
893 We thus believe this alternative explanation to be unlikely. Overall, our task decoding results are in line  
894 with the idea of multiplexing of task information in the brain. Future research will have to test more  
895 directly which environmental conditions lead to multiplexing of task information in the brain, and which  
896 do not.



## 897 The roles of dmPFC and parietal cortex in value-related and task-related processes

898 The dmPFC is a key region for decision-making in dynamic environments. It supports effort-based  
899 foraging choices (Wisniewski et al., 2015b), and here we extend this finding by showing its involvement in  
900 a different task with different outcomes (reward reversal learning). The dmPFC is important for cognitive  
901 control, supporting rule and action selection (Rowe et al., 2008), working memory (Taylor et al., 2004),  
902 and processing uncertainty (Volz et al., 2003). It has further been associated with valuation processes,  
903 anticipating both positive and negative outcomes (Jensen et al., 2003; Knutson et al., 2003), and encoding  
904 reward prediction errors (Vassena et al., 2014). In this experiment, we demonstrated that the dmPFC is  
905 specifically involved in encoding tasks only at the time at which a choice is made, other regions later  
906 maintain that choice outcome until it can be executed. We also demonstrated the dmPFC to encode  
907 outcome values at the same time. Please note that we do not claim this value signal to only represent the  
908 magnitude of reward outcomes, it might also represent related processes (e.g. attention). Nevertheless,  
909 the cause of this effect are different outcome values, and this highlights the importance of dmPFC in  
910 linking valuation to strategic decision-making, providing an explanation to how it might support goal-  
911 directed behavior (Viard et al., 2011).

912 The second key region identified in this experiment was the left parietal cortex, especially around the IPS.  
913 This brain region encodes prediction errors (Daw and Doya, 2006; Matsumoto et al., 2007; Katahira et al.,  
914 2015), which might signal model updating (Behrens et al., 2007; Walton et al., 2007; Rutledge et al., 2010).  
915 Alternatively, it has been suggested that the parietal cortex signals surprise, and does not reflect model  
916 updating (O'Reilly et al., 2013). Our findings are more in line with surprise signaling, the only brain region  
917 possibly involved in model updating in our experiment was the anterior medial PFC (see also (Braem et  
918 al., 2013). The parietal cortex is also a key region for cognitive control (Ruge et al., 2009), and working  
919 memory (Christophel et al., 2017). It is part of the multiple demand network (Duncan, 2010; Fedorenko  
920 et al., 2013), a set of brain regions characterized by their high flexibility to adapt to changing demands.

921 Previous work on non-human primates demonstrated that the prefrontal cortex flexibly switches between  
922 representing different control-related information within single trials (Sigala et al., 2008; Stokes et al.,  
923 2013). Our results show that the parietal cortex in humans exhibits similar flexibility. It switches between  
924 encoding control-related and value-related variables within single trials. This provides compelling  
925 evidence for the flexibility of the parietal cortex in adapting to rapidly changing task demands.

## 926 Conclusion

927 In this experiment, we assessed whether controlling outcomes affects outcome valuation and choice  
928 implementation in the brain. By comparing choices that are informed by expected outcomes as well as  
929 choices that are not, we linked largely parallel research on ‘free choice’ (Libet et al., 1983) and value-  
930 based decision-making (Hampton and O’Doherty, 2007), which has been long overdue. While we found  
931 strong effects on outcome valuation, we found no such effects on choice implementation. Our results  
932 further highlight the importance of both the dmPFC and parietal cortex in bridging valuation and executive  
933 processes in the brain. Both regions have been involved in processing task choices and their reward  
934 outcomes, flexibly switching between encoding value-related and task-related information.

## 935 References

- 936 Andraszewicz S, Scheibehenne B, Rieskamp J, Grasman R, Verhagen J, Wagenmakers E-J (2015) An  
937 Introduction to Bayesian Hypothesis Testing for Management Research. *J Manag* 41:521–543.
- 938 Arrington CM, Logan GD (2004) The cost of a voluntary task switch. *Psychol Sci* 15:610–615.
- 939 Bai Y, Katahira K, Ohira H (2014) Dual learning processes underlying human decision-making in reversal  
940 learning tasks: functional significance and evidence from the model fit to human behavior. *Front*  
941 *Psychol* 5 Available at: <https://www.frontiersin.org/articles/10.3389/fpsyg.2014.00871/full>  
942 [Accessed May 31, 2018].
- 943 Behrens TEJ, Woolrich MW, Walton ME, Rushworth MFS (2007) Learning the value of information in an  
944 uncertain world. *Nat Neurosci* 10:1214–1221.
- 945 Bhandari A, Gagne C, Badre D (2018) Just above Chance: Is It Harder to Decode Information from Human  
946 Prefrontal Cortex Blood Oxygenation Level-dependent Signals? *J Cogn Neurosci*:1–26.
- 947 Botvinick MM, Cohen JD (2014) The Computational and Neural Basis of Cognitive Control: Charted  
948 Territory and New Frontiers. *Cogn Sci* 38:1249–1285.
- 949 Braem S, King JA, Korb FM, Krebs RM, Notebaert W, Egner T (2013) Affective Modulation of Cognitive  
950 Control is Determined by Performance-Contingency and Mediated by Ventromedial Prefrontal  
951 and Cingulate Cortex. *J Neurosci* 33:16961–16970.
- 952 Bunge SA, Kahn I, Wallis JD, Miller EK, Wagner AD (2003) Neural Circuits Subserving the Retrieval and  
953 Maintenance of Abstract Rules. *J Neurophysiol* 90:3419–3428.
- 954 Burnham KP, Anderson DR (2004) Multimodel Inference: Understanding AIC and BIC in Model Selection.  
955 *Sociol Methods Res* 33:261–304.
- 956 Cacioppo JT, Petty RE, Chuan Feng Kao (1984) The Efficient Assessment of Need for Cognition. *J Pers*  
957 *Assess* 48:306.
- 958 Carver CS, White TL (1994) Behavioral inhibition, behavioral activation, and affective responses to  
959 impending reward and punishment: the BIS/BAS scales. *J Pers Soc Psychol* 67:319.
- 960 Christophel TB, Klink PC, Spitzer B, Roelfsema PR, Haynes J-D (2017) The Distributed Nature of Working  
961 Memory. *Trends Cogn Sci* 21:111–124.
- 962 Chudasama Y, Daniels TE, Gorrin DP, Rhodes SEV, Rudebeck PH, Murray EA (2013) The Role of the  
963 Anterior Cingulate Cortex in Choices based on Reward Value and Reward Contingency. *Cereb*  
964 *Cortex* 23:2884–2898.
- 965 Collins AGE, Ciullo B, Frank MJ, Badre D (2017) Working Memory Load Strengthens Reward Prediction  
966 Errors. *J Neurosci* 37:4332–4342.

- 967 Cox DD, Savoy RL (2003) Functional magnetic resonance imaging (fMRI) “brain reading”: detecting and  
968 classifying distributed patterns of fMRI activity in human visual cortex. *NeuroImage* 19:261–270.
- 969 Daw ND, Doya K (2006) The computational neurobiology of learning and reward. *Curr Opin Neurobiol*  
970 16:199–204.
- 971 Daw ND, Gershman SJ, Seymour B, Dayan P, Dolan RJ (2011) Model-Based Influences on Humans’  
972 Choices and Striatal Prediction Errors. *Neuron* 69:1204–1215.
- 973 Domenech P, Redouté J, Koechlin E, Dreher J-C (2018) The Neuro-Computational Architecture of Value-  
974 Based Selection in the Human Brain. *Cereb Cortex* 28:585–601.
- 975 Doya K (2008) Modulators of decision making. *Nat Neurosci* 11:410–416.
- 976 Dreisbach G, Fischer R (2012) The role of affect and reward in the conflict-triggered adjustment of  
977 cognitive control. *Front Hum Neurosci* 6 Available at:  
978 <http://www.ncbi.nlm.nih.gov/pmc/articles/PMC3533233/> [Accessed October 30, 2014].
- 979 Dreisbach G, Wenke D (2011) The shielding function of task sets and its relaxation during task switching.  
980 *J Exp Psychol Learn Mem Cogn* 37:1540–1546.
- 981 Duncan J (2010) The multiple-demand (MD) system of the primate brain: mental programs for intelligent  
982 behaviour. *Trends Cogn Sci* 14:172–179.
- 983 Eklund A, Nichols TE, Knutsson H (2016) Cluster failure: Why fMRI inferences for spatial extent have  
984 inflated false-positive rates. *Proc Natl Acad Sci* 113:7900–7905.
- 985 Elliott R, Newman JL, Longe OA, William Deakin JF (2004) Instrumental responding for rewards is  
986 associated with enhanced neuronal response in subcortical reward systems. *NeuroImage*  
987 21:984–990.
- 988 Etzel JA, Cole MW, Zacks JM, Kay KN, Braver TS (2016) Reward Motivation Enhances Task Coding in  
989 Frontoparietal Cortex. *Cereb Cortex* 26:1647–1659.
- 990 Fedorenko E, Duncan J, Kanwisher N (2013) Broad domain generality in focal regions of frontal and  
991 parietal cortex. *Proc Natl Acad Sci* 110:16616–16621.
- 992 Forstmann BU, Wagenmakers E-J (2015) *An Introduction to Model-Based Cognitive Neuroscience*.  
993 Springer.
- 994 Friston KJ, Holmes AP, Worsley KJ, Poline J-P, Frith CD, Frackowiak RS (1994) Statistical parametric maps  
995 in functional imaging: a general linear approach. *Hum Brain Mapp* 2:189–210.
- 996 Gilbert SJ (2011) Decoding the Content of Delayed Intentions. *J Neurosci* 31:2888–2894.
- 997 Hampton AN, O’Doherty JP (2007) Decoding the neural substrates of reward-related decision making  
998 with functional MRI. *Proc Natl Acad Sci* 104:1377–1382.
- 999 Haxby JV (2012) Multivariate pattern analysis of fMRI: The early beginnings. *NeuroImage* 62:852–855.

- 1000 Haynes J-D (2015) A Primer on Pattern-Based Approaches to fMRI: Principles, Pitfalls, and Perspectives.  
1001 Neuron 87:257–270.
- 1002 Haynes J-D, Sakai K, Rees G, Gilbert SJ, Frith C, Passingham RE (2007) Reading Hidden Intentions in the  
1003 Human Brain. *Curr Biol* 17:323–328.
- 1004 Hebart MN, Gorgen K, Haynes J-D (2014) The Decoding Toolbox (TDT): A versatile software package for  
1005 multivariate analyses of functional imaging data. *Front Neuroinformatics* 8:88.
- 1006 Ikeda T, Hikosaka O (2003) Reward-Dependent Gain and Bias of Visual Responses in Primate Superior  
1007 Colliculus. *Neuron* 39:693–700.
- 1008 Izquierdo A, Suda RK, Murray EA (2004) Bilateral Orbital Prefrontal Cortex Lesions in Rhesus Monkeys  
1009 Disrupt Choices Guided by Both Reward Value and Reward Contingency. *J Neurosci* 24:7540–  
1010 7548.
- 1011 Jensen J, McIntosh AR, Crawley AP, Mikulis DJ, Remington G, Kapur S (2003) Direct Activation of the  
1012 Ventral Striatum in Anticipation of Aversive Stimuli. *Neuron* 40:1251–1257.
- 1013 Jimura K, Locke HS, Braver TS (2010) Prefrontal cortex mediation of cognitive enhancement in rewarding  
1014 motivational contexts. *Proc Natl Acad Sci* 107:8871–8876.
- 1015 Kahnt T, Park SQ, Haynes J-D, Tobler PN (2014) Disentangling neural representations of value and  
1016 salience in the human brain. *Proc Natl Acad Sci* 111:5000–5005.
- 1017 Kamitani Y, Tong F (2005) Decoding the visual and subjective contents of the human brain. *Nat Neurosci*  
1018 8:679–685.
- 1019 Kaplan JT, Man K, Greening SG (2015) Multivariate cross-classification: applying machine learning  
1020 techniques to characterize abstraction in neural representations. *Front Hum Neurosci* 9  
1021 Available at: <http://www.ncbi.nlm.nih.gov/pmc/articles/PMC4373279/> [Accessed December 10,  
1022 2015].
- 1023 Katahira K, Matsuda Y-T, Fujimura T, Ueno K, Asamizuya T, Suzuki C, Cheng K, Okanoya K, Okada M  
1024 (2015) Neural basis of decision making guided by emotional outcomes. *J Neurophysiol*  
1025 113:3056–3068.
- 1026 Knutson B, Fong GW, Bennett SM, Adams CM, Hommer D (2003) A region of mesial prefrontal cortex  
1027 tracks monetarily rewarding outcomes: characterization with rapid event-related fMRI.  
1028 *NeuroImage* 18:263–272.
- 1029 Kriegeskorte N, Goebel R, Bandettini P (2006) Information-based functional brain mapping. *Proc Natl*  
1030 *Acad Sci* 103:3863–3868.
- 1031 Levine SM, Schwarzbach J (2017) Decoding of auditory and tactile perceptual decisions in parietal  
1032 cortex. *NeuroImage* 162:297–305.

- 1033 Libet B, Gleason CA, Wright EW, Pearl DK (1983) Time of conscious intention to act in relation to onset of  
1034 cerebral activity (readiness-potential) the unconscious initiation of a freely voluntary act. *Brain*  
1035 106:623–642.
- 1036 Lien M-C, Ruthruff E, Remington RW, Johnston JC (2005) On the limits of advance preparation for a task  
1037 switch: do people prepare all the task some of the time or some of the task all the time? *J Exp*  
1038 *Psychol Hum Percept Perform* 31:299–315.
- 1039 Loose LS, Wisniewski D, Rusconi M, Goschke T, Haynes J-D (2017) Switch-Independent Task  
1040 Representations in Frontal and Parietal Cortex. *J Neurosci* 37:8033–8042.
- 1041 Matsumoto M, Matsumoto K, Abe H, Tanaka K (2007) Medial prefrontal cell activity signaling prediction  
1042 errors of action values. *Nat Neurosci* 10:647–656.
- 1043 Mertens G, De Houwer J (2016) Potentiation of the startle reflex is in line with contingency reversal  
1044 instructions rather than the conditioning history. *Biol Psychol* 113:91–99.
- 1045 Mitchell TM, Hutchinson R, Niculescu RS, Pereira F, Wang X, Just M, Newman S (2004) Learning to  
1046 decode cognitive states from brain images. *Mach Learn* 57:145–175.
- 1047 O’Doherty JP, Hampton A, Kim H (2007) Model-Based fMRI and Its Application to Reward Learning and  
1048 Decision Making. *Ann N Y Acad Sci* 1104:35–53.
- 1049 O’Reilly JX, Schüffelgen U, Cuell SF, Behrens TEJ, Mars RB, Rushworth MFS (2013) Dissociable effects of  
1050 surprise and model update in parietal and anterior cingulate cortex. *Proc Natl Acad Sci*  
1051 110:E3660–E3669.
- 1052 Patton JH, Stanford MS, Barratt ES (1995) Factor structure of the Barratt impulsiveness scale. *J Clin*  
1053 *Psychol* 51:768–774.
- 1054 Peirce JW (2007) PsychoPy—Psychophysics software in Python. *J Neurosci Methods* 162:8–13.
- 1055 Pessiglione M, Seymour B, Flandin G, Dolan RJ, Frith CD (2006) Dopamine-dependent prediction errors  
1056 underpin reward-seeking behaviour in humans. *Nature* 442:1042–1045.
- 1057 Qiao L, Zhang L, Chen A, Egnér T (2017) Dynamic Trial-by-Trial Recoding of Task-Set Representations in  
1058 the Frontoparietal Cortex Mediates Behavioral Flexibility. *J Neurosci* 37:11037–11050.
- 1059 Rouder JN, Speckman PL, Sun D, Morey RD, Iverson G (2009) Bayesian tests for accepting and rejecting  
1060 the null hypothesis. *Psychon Bull Rev* 16:225–237.
- 1061 Rowe J, Hughes L, Eckstein D, Owen AM (2008) Rule-Selection and Action-Selection have a Shared  
1062 Neuroanatomical Basis in the Human Prefrontal and Parietal Cortex. *Cereb Cortex N Y NY*  
1063 18:2275–2285.
- 1064 Rubinstein JS, Meyer DE, Evans JE (2001) Executive control of cognitive processes in task switching. *J Exp*  
1065 *Psychol Hum Percept Perform* 27:763–797.

- 1066 Ruge H, Braver T, Meiran N (2009) Attention, intention, and strategy in preparatory control.  
1067 *Neuropsychologia* 47:1670–1685.
- 1068 Ruge H, Müller S, Braver T (2010) Anticipating the consequences of action: An fMRI study of intention-  
1069 based task preparation. *Psychophysiology* 47:1019–1027.
- 1070 Rutledge RB, Dean M, Caplin A, Glimcher PW (2010) Testing the Reward Prediction Error Hypothesis  
1071 with an Axiomatic Model. *J Neurosci* 30:13525–13536.
- 1072 Schultz W (2016) Dopamine reward prediction-error signalling: a two-component response. *Nat Rev*  
1073 *Neurosci* 17:183–195.
- 1074 Sigala N, Kusunoki M, Nimmo-Smith I, Gaffan D, Duncan J (2008) Hierarchical coding for sequential task  
1075 events in the monkey prefrontal cortex. *Proc Natl Acad Sci* 105:11969–11974.
- 1076 Soon CS, Brass M, Heinze H-J, Haynes J-D (2008) Unconscious determinants of free decisions in the  
1077 human brain. *Nat Neurosci* 11:543–545.
- 1078 Soon CS, He AH, Bode S, Haynes J-D (2013) Predicting free choices for abstract intentions. *Proc Natl Acad*  
1079 *Sci* 110:6217–6222.
- 1080 Sperduti M, Delaveau P, Fossati P, Nadel J (2011) Different brain structures related to self- and external-  
1081 agency attribution: a brief review and meta-analysis. *Brain Struct Funct* 216:151–157.
- 1082 Stokes MG, Kusunoki M, Sigala N, Nili H, Gaffan D, Duncan J (2013) Dynamic Coding for Cognitive Control  
1083 in Prefrontal Cortex. *Neuron* 78:364–375.
- 1084 Sugrue LP (2004) Matching Behavior and the Representation of Value in the Parietal Cortex. *Science*  
1085 304:1782–1787.
- 1086 Sutton RS, Barto AG (1990) Time-derivative models of Pavlovian reinforcement. In: *Learning and*  
1087 *computational neuroscience: Foundations of adaptive networks* (Gabriel M, Moore J, eds), pp  
1088 497–537. Cambridge, MA, US: The MIT Press.
- 1089 Taylor SF, Welsh RC, Wager TD, Luan Phan K, Fitzgerald KD, Gehring WJ (2004) A functional  
1090 neuroimaging study of motivation and executive function. *NeuroImage* 21:1045–1054.
- 1091 Thurley K, Senn W, Lüscher H-R (2008) Dopamine Increases the Gain of the Input-Output Response of  
1092 Rat Prefrontal Pyramidal Neurons. *J Neurophysiol* 99:2985–2997.
- 1093 Tobler PN, Fiorillo CD, Schultz W (2005) Adaptive Coding of Reward Value by Dopamine Neurons.  
1094 *Science* 307:1642–1645.
- 1095 Todd MT, Nystrom LE, Cohen JD (2013) Confounds in multivariate pattern analysis: Theory and rule  
1096 representation case study. *NeuroImage* 77:157–165.
- 1097 Torrubia R, Ávila C, Moltó J, Caseras X (2001) The Sensitivity to Punishment and Sensitivity to Reward  
1098 Questionnaire (SPSRQ) as a measure of Gray's anxiety and impulsivity dimensions. *Personal*  
1099 *Individ Differ* 31:837–862.

- 1100 Tricomi EM, Delgado MR, Fiez JA (2004) Modulation of Caudate Activity by Action Contingency. *Neuron*  
1101 41:281–292.
- 1102 Vassena E, Krebs RM, Silvetti M, Fias W, Verguts T (2014) Dissociating contributions of ACC and vmPFC in  
1103 reward prediction, outcome, and choice. *Neuropsychologia* 59:112–123.
- 1104 Viard A, Doeller CF, Hartley T, Bird CM, Burgess N (2011) Anterior Hippocampus and Goal-Directed  
1105 Spatial Decision Making. *J Neurosci* 31:4613–4621.
- 1106 Volz KG, Schubotz RI, von Cramon DY (2003) Predicting events of varying probability: uncertainty  
1107 investigated by fMRI. *NeuroImage* 19:271–280.
- 1108 Wagenmakers E-J (2007) A practical solution to the pervasive problems of p values. *Psychon Bull Rev*  
1109 14:779–804.
- 1110 Walton ME, Croxson PL, Behrens TEJ, Kennerley SW, Rushworth MFS (2007) Adaptive decision making  
1111 and value in the anterior cingulate cortex. *NeuroImage* 36:T142–T154.
- 1112 Waskom ML, Kumaran D, Gordon AM, Rissman J, Wagner AD (2014) Frontoparietal Representations of  
1113 Task Context Support the Flexible Control of Goal-Directed Cognition. *J Neurosci* 34:10743–  
1114 10755.
- 1115 Wisniewski D, Goschke T, Haynes J-D (2016) Similar coding of freely chosen and externally cued  
1116 intentions in a fronto-parietal network. *NeuroImage* 134:450–458.
- 1117 Wisniewski D, Reverberi C, Momennejad I, Kahnt T, Haynes J-D (2015a) The Role of the Parietal Cortex in  
1118 the Representation of Task–Reward Associations. *J Neurosci* 35:12355–12365.
- 1119 Wisniewski D, Reverberi C, Tusche A, Haynes J-D (2015b) The Neural Representation of Voluntary Task-  
1120 Set Selection in Dynamic Environments. *Cereb Cortex* 25:4715–4726.
- 1121 Woolgar A, Afshar S, Williams MA, Rich AN (2015) Flexible Coding of Task Rules in Frontoparietal Cortex:  
1122 An Adaptive System for Flexible Cognitive Control. *J Cogn Neurosci*:1–17.
- 1123 Woolgar A, Golland P, Bode S (2014) Coping with confounds in multivoxel pattern analysis: What should  
1124 we do about reaction time differences? A comment on Todd, Nystrom & Cohen 2013.  
1125 *NeuroImage* 98:506–512.
- 1126 Zhang J, Kriegeskorte N, Carlin JD, Rowe JB (2013) Choosing the Rules: Distinct and Overlapping  
1127 Frontoparietal Representations of Task Rules for Perceptual Decisions. *J Neurosci* 33:11852–  
1128 11862.
- 1129



1130 **Supplementary Material**

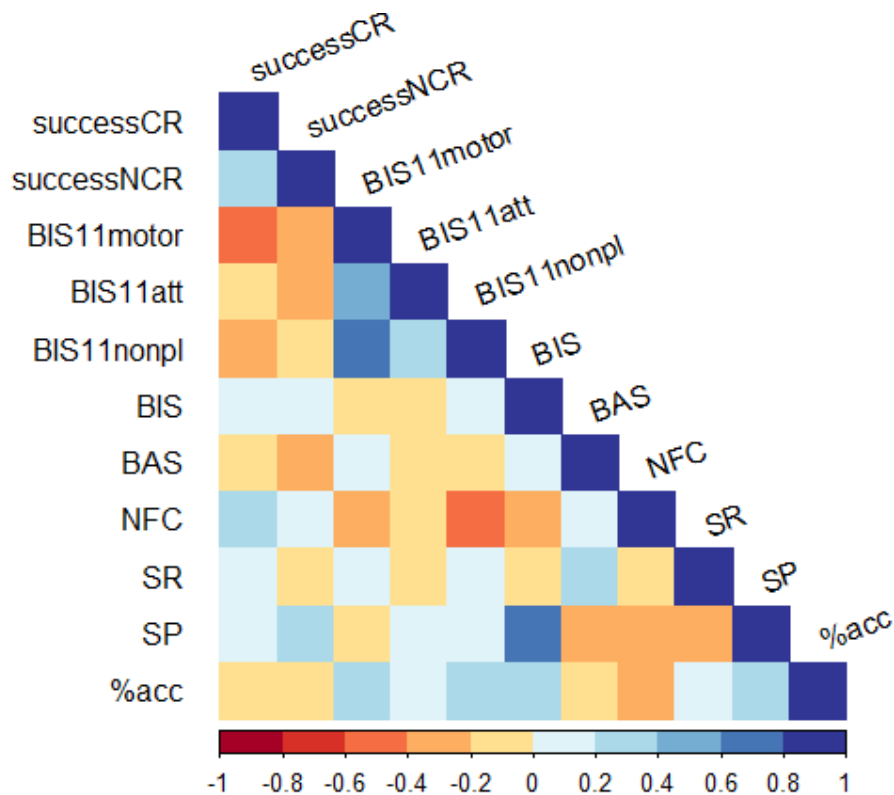

1131

1132 **Supplementary Figure 1:** Correlation analysis. An additional exploratory analysis was performed to  
1133 correlate performance, questionnaire measures, and decoding accuracies (baseline task decoding, from  
1134 the parietal cortex cluster). Depicted are all pairwise correlations between % high reward choices in CR  
1135 trials (successCR), % high reward choices in NCR trials (successNCR), motor impulsivity (BIS11motor),  
1136 attentional impulsivity (BIS11att), non-planning impulsivity (BIS11nonpl), behavioral inhibition (BIS),  
1137 behavioral approach (BAS), need for cognition (NFC), sensitivity to reward (SR), sensitivity to punishment  
1138 (SP), and decoding accuracies in the baseline task decoding analysis in the parietal cortex (%acc). The plot  
1139 was generated using the *corrplot* package in R.

1140 Despite this descriptive approach, we also tested the strength of these correlations in a Bayesian  
1141 framework (using *bayes.cor.test* from the BayesianFirstAid package in R). Although our conclusions are  
1142 based on this correlation analysis, we also report classically estimated correlations and corresponding p-  
1143 values for the interested reader. We expected successful performance to be correlated with higher need  
1144 for cognition, lower impulsivity, and higher sensitivity to reward. We also expected task coding to be  
1145 related to task performance, with better performance related to higher accuracies. Higher accuracies  
1146 could also be related to lower impulsivity, higher sensitivity to reward, and higher need for cognition.  
1147 Successful performance was correlated with impulsivity, as measured using the BIS11,  $r = -.34$  (95%CI = [-  
1148 .62 -.024]; classical estimation  $r = -.33$ ,  $p = 0.052$ ), with impulsive subjects being less successful in

1149 performing the reversal learning task. The BIS11 further splits impulsivity into three components:  
1150 attentional, motor, and non-planning impulsivity. The observed correlation was mostly driven by motor  
1151 impulsivity ( $r = -.45$ , 95%CI =  $[-.70 \text{ } -.15]$ ;  $r = -.47$ ,  $p = 0.004$ ), but not by non-planning ( $r = -.19$ , 95%CI =  $[-$   
1152  $.52 \text{ } .14]$ ;  $r = -.20$ ,  $p = 0.24$ ) or attentional impulsivity ( $r = -.11$ , 95%CI =  $[-.45 \text{ } .02]$ ;  $r = -.11$ ,  $p = 0.51$ ). There  
1153 was no correlation of success with either sensitivity to reward ( $r = .04$ , 95%CI =  $[-.29 \text{ } .38]$ ;  $r = .06$ ,  $p = 0.71$ ),  
1154 or the need for cognition ( $r = .26$ , 95%CI =  $[-.07 \text{ } .56]$ ;  $r = .26$ ,  $p = 0.11$ ), despite the fact the need for  
1155 cognition seems to be associated with reward decision-making (Sandra and Otto 2018). A qualitatively  
1156 similar pattern was evident for decoding accuracies, extracted during intention maintenance from the  
1157 parietal cortex. Correlations with impulsivity ( $r = -.27$ , 95%CI =  $[-.57 \text{ } .07]$ ;  $r = -.32$ ,  $p = 0.053$ ), sensitivity to  
1158 reward ( $r = -.04$ , 95%CI =  $[-.38 \text{ } .31]$ ,  $r = .17$ ,  $p = 0.30$ ), and need for cognition ( $r = .09$ , 95%CI =  $[-.24 \text{ } .41]$ ;  $r$   
1159  $= -.24$ ,  $p = 0.16$ ) were at least similar numerically to the correlations with task success. Given that the  
1160 evidence was somewhat weaker in this analysis, results should be interpreted with care however. Overall,  
1161 task performance and to a lesser degree decoding accuracies seem to be most strongly related to  
1162 impulsivity, and not to sensitivity to reward or need for cognition. This unexpected link to impulsivity  
1163 should be addressed directly in future research.

1164 Sandra, D.A., & Otto A.R. (2018) Cognitive Capacity Limitations and Need for Cognition Differentially  
1165 Predict Reward-Induced Cognitive Effort Expenditure. *Cognition*, 172: 101–6.

1166

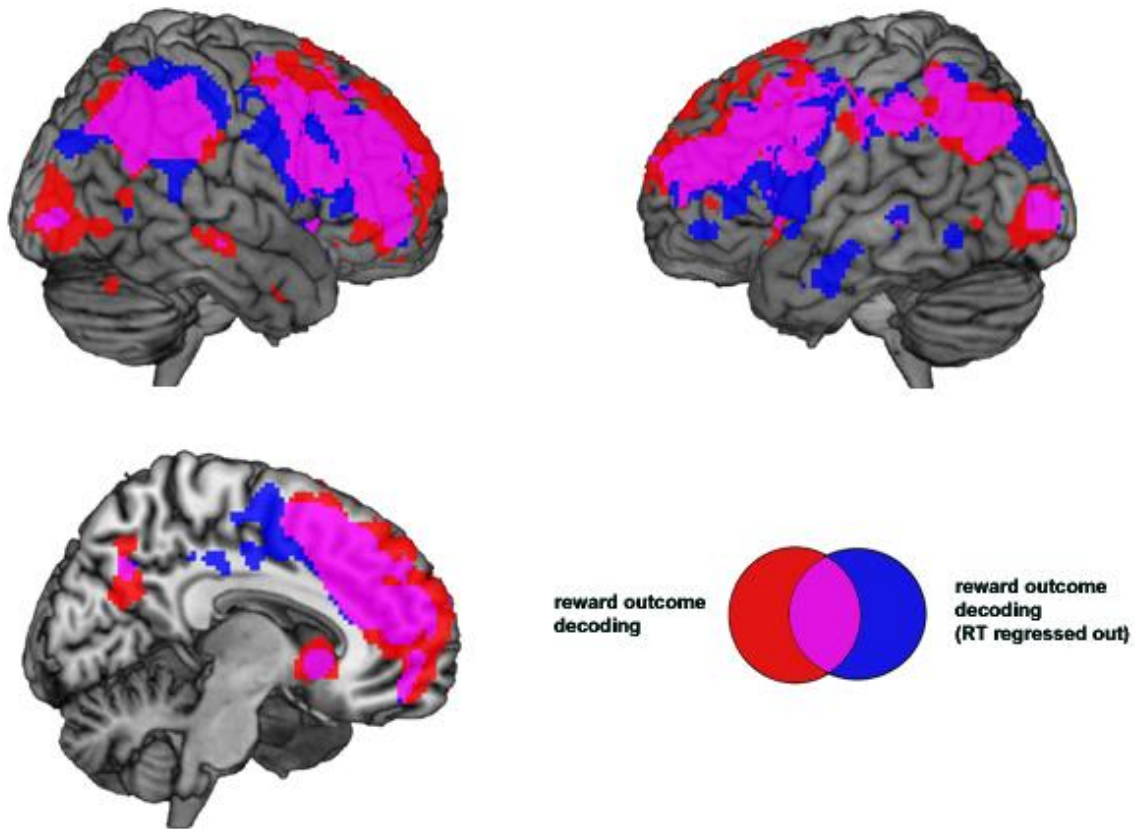

1167

1168 **Supplementary Figure 2.** Controlling RT-effects in reward outcome coding. We repeated the reward  
1169 outcome decoding analysis, using a similar first-level GLM to estimate signals (4 regressors: each  
1170 combination of high vs low reward, contingent vs non-contingent reward, locked to feedback onset).  
1171 Additionally, we added regressors of non-interest capturing RT-related variance in the data. The rest of  
1172 the analysis was identical to the reward outcome decoding analysis presented in the main body of the  
1173 text. Results from the reward outcome decoding analysis (red), and the same analysis with RT-related  
1174 effects regressed out of the data (blue) are depicted. As can be seen, the overlap between both analyses  
1175 is substantial. Results depicted at  $p < 0.05$  (FWE, corrected at the voxel level). This indicates that  
1176 controlling for RT did not strongly alter our results.

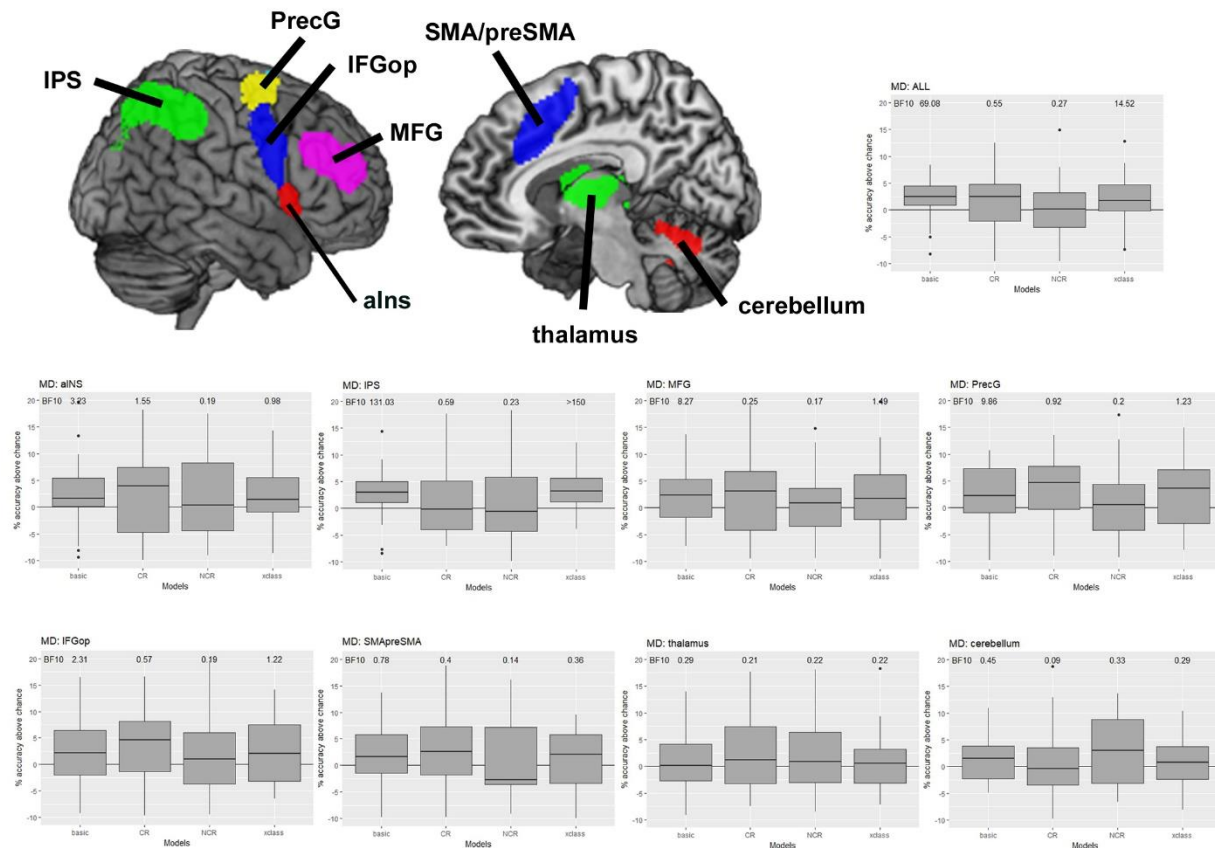

1177

1178 **Supplementary Figure 3.** Task information in the multiple demand (MD) network. Depicted are task  
 1179 decoding results in the bilateral functional ROIs provided by Fedorenko, Duncan, & Kanwisher (2013),  
 1180 specifically the anterior insula (aINS), cerebellum, inferior frontal gyrus pars opercularis (IFGop),  
 1181 intraparietal sulcus (IPS), middle frontal gyrus (MFG), pre-central gyrus (precG), supplementary and pre-  
 1182 supplementary motor area (SMA/preSMA), as well as thalamus. Averaging across all MD regions, we  
 1183 found strong evidence for the presence of task information (2.23%, SEM = 0.61%, BF10 = 69.08,  $t(34)$  =  
 1184 3.63,  $p < 0.001$ , Figure 1). We then tested whether accuracies were higher in CR trials than in NCR trials,  
 1185 using the same analysis as used for the regions identified in the main task decoding analysis. We found no  
 1186 evidence for a higher accuracy in CR, as compared to NCR trials (BF10 = 0.37,  $t(34)$  = 0.68,  $p = 0.24$ ).  
 1187 Furthermore, we found task coding to be contingency-invariant, using a cross-classification approach  
 1188 (2.02%, SEM = 0.67%, BF10 = 14.52,  $t(34)$  = 2.97,  $p = 0.002$ ). Accuracies in the baseline and cross-  
 1189 classification analysis did not differ (BF10 = 5.11,  $t(34)$  = 0.40,  $p = 0.68$ ). This suggests that the MD network  
 1190 encodes tasks in a contingency-invariant fashion, and shows that the current context does not affect task  
 1191 coding in the MD network. This is despite the clear effects contingency has on the coding of reward  
 1192 outcomes.

1193 Looking at individual MD regions, we found task information in the aINS (2.25%, SEM = 1.00%, BF10 =  
 1194 3.23,  $t(34)$  = 2.24,  $p = 0.01$ ), IPS (2.83%, SEM = 0.72%, BF10 = 131.02,  $t(34)$  = 3.88,  $p < 0.001$ ), MFG (2.44%,  
 1195 SEM = 0.90%, BF10 = 8.26,  $t(34)$  = 2.71,  $p = 0.005$ ), precentral gyrus (2.48%, SEM = 0.87, BF10 = 9.86,  $t(34)$

1196 = 2.79,  $p = 0.004$ ), but not in the cerebellum (0.85%, SEM = 0.90%,  $BF_{10} = 0.44$ ,  $t(34) = 0.94$ ,  $p = 0.17$ ),  
1197 IFGop (2.11%, SEM = 1.02%,  $BF_{10} = 2.31$ ,  $t(34) = 2.06$ ,  $p = 0.02$ ) SMA/preSMA (1.48%, SEM = 1.07%,  $BF_{10}$   
1198 = 0.77,  $t(34) = 1.37$ ,  $p = 0.08$ ), and thalamus (0.58%, SEM = 1.06%,  $BF_{10} = 0.29$ ,  $t(34) = 0.54$ ,  $p = 0.29$ ).  
1199 None of these regions showed a higher accuracy in CR than in NCR trials ( $BF_{10} \leq 0.60$ ,  $ts(34) < 1.19$ ,  $ps$   
1200  $> 0.12$ ). However, in all of those regions the accuracy in the baseline and xclass analyses was equal ( $BF_{10}$   
1201  $\geq 3.47$ ,  $ts(34) < 1.00$ ,  $ps > 0.32$ ). In sum, we did not find our reward manipulation to affect task coding in  
1202 the MD network. We did find contingency-invariant task information in this network however. Also, not  
1203 all parts of the MD network seemed to be encoding tasks in our experiment.

1204 Fedorenko E, Duncan J, Kanwisher N. 2013. Broad domain generality in focal regions of frontal and  
1205 parietal cortex. *P Natl Acad Sci USA*. 110:16616–16621.
